1    **Full Title:**

2    **Highly efficient and versatile plasmid-based gene editing in primary T cells**

3

4    **Running Title:**

5    Gene editing in primary T cells

6

7    **Authors**

8    Mara Kornete<sup>\*,†</sup>, Romina Marone<sup>\*,†</sup> and Lukas T. Jeker<sup>\*,†,‡</sup>

9

10   **Affiliations**

11   <sup>\*</sup>Department of Biomedicine, Basel University Hospital and University of Basel,

12   Hebelstrasse 20, CH-4031 Basel, Switzerland.

13   <sup>†</sup>Transplantation Immunology & Nephrology, Basel University Hospital,

14   Petersgraben 4, CH-4031 Basel, Switzerland

15

16   <sup>‡</sup> Corresponding author:

17   Lukas T. Jeker, MD PhD

18   Phone: +41 61 328 50 27

19   [lukas.jeker@unibas.ch](mailto:lukas.jeker@unibas.ch)

20

21

22    **Abstract:**

23    Adoptive cell transfer (ACT) is an important approach for basic research and emerges  
 24    as an effective treatment for various diseases including infections and blood cancers.  
 25    Direct genetic manipulation of primary immune cells opens up unprecedented  
 26    research opportunities and could be applied to enhance cellular therapeutic products.  
 27    Here, we report highly efficient genome engineering in primary murine T cells using  
 28    a plasmid-based RNA-guided CRISPR system. We developed a straightforward  
 29    approach to ablate genes in up to 90% of cells and to introduce precisely targeted  
 30    single nucleotide polymorphisms (SNP) in up to 25% of the transfected primary T  
 31    cells. We used gene editing-mediated allele switching to quantify homology directed  
 32    repair (HDR), systematically optimize experimental parameters and map a native B  
 33    cell epitope in primary T cells. Allele switching of a surrogate cell surface marker can  
 34    be used to enrich cells with successful simultaneous editing of a second gene of  
 35    interest. Finally, we applied the approach to correct two disease-causing mutations in  
 36    the *Foxp3* gene. Both repairing the cause of the scurfy syndrome, a 2bp insertion in  
 37    *Foxp3*, and repairing the clinically relevant *Foxp3*<sup>K276X</sup> mutation restored *Foxp3*  
 38    expression in primary T cells.

39

40

41 ***Introduction:***

42 Lymphocytes are among the best understood mammalian cells. A plethora of  
 43 genetically modified mice have yielded deep insight into the molecular and cellular  
 44 processes underlying lymphocyte, but also more generally, mammalian development  
 45 and function. Inbred mouse strains enable adoptive transfer experiments without  
 46 immunological rejection. However, although genetically modified murine models are  
 47 very powerful, a major practical limitation is the time required to generate genetically  
 48 altered mice. Moreover, intercrossing mice with combinations of mutations and/or  
 49 transgenes requires extensive breeding. Finally, for immunologic reasons a given  
 50 genetic alteration often either needs to be introduced on a particular genetic  
 51 background, or mice need to be backcrossed for multiple generations to change the  
 52 genetic background. Thus, systems to directly genetically edit murine lymphocytes  
 53 would be highly desirable to reduce the need for breeding.

54 While previous efforts to establish CRISPR/Cas9-mediated gene editing in primary T  
 55 cells have mainly focused on human T cells (1), (2), (3), (4) to our knowledge only  
 56 two reports describe successful CRISPR/Cas9 gene editing in primary murine T cells  
 57 (5), (6). Both approaches depend on mice expressing transgenic Cas9 and either a  
 58 second transgenic construct to express the gRNA (5), or viral transduction of T cells  
 59 followed by antibiotic selection (6). As a result, although these approaches constitute  
 60 significant advances, they still require breeding of a constitutive Cas9 transgene,  
 61 which may be genotoxic and might lead to immunologic rejection after adoptive  
 62 transfer of transgenic cells.

63 In an earlier report transfection of plasmids for CRISPR/Cas9-mediated genome  
 64 editing in human hematopoietic stem cells (hHSC) and CD4<sup>+</sup> T cells was successfully  
 65 used (1). However, gene ablation was less efficient in T cells than hHSCs with

66 efficiencies in primary human CD4<sup>+</sup> T cells mostly <10%, even with a strategy using  
67 two gRNAs targeting the same gene simultaneously. Subsequently, it was reported  
68 that CRISPR/Cas9 genome engineering could be improved in primary human T cells  
69 by replacing plasmids with chemically modified guide RNAs combined with Cas9  
70 encoding mRNA (3). Nucleofection with a plasmid encoding both the sgRNA and  
71 Cas9 did not demonstrate editing efficiencies above background while co-transfection  
72 of a chemically modified sgRNA with a Cas9 expressing plasmid yielded deletion in  
73 <10% of T cells. This is in comparison to high double digit deletion efficiencies with  
74 sgRNA and Cas9 mRNA (3). Similarly, electroporation of recombinant Cas9/gRNA  
75 ribonucleoprotein complexes (RNPs) results in moderate to high double digit deletion  
76 efficiencies (2). More recently, multiplexed high efficiency CRISPR/Cas9 editing was  
77 reported using mRNA and multiple in vitro transcribed sgRNAs (4). Thus, there is a  
78 growing notion that in comparison to other approaches DNA-based techniques work  
79 poorly, if at all, for CRISPR/Cas9 gene editing in primary T cells (2), (3), (7), (8).  
80 However, as plasmids have been the workhorse of molecular biology for decades  
81 because of their ease of use, versatility, low production costs and their wide  
82 availability to the scientific community they would have specific merits were they to  
83 be successfully used. Importantly, thousands of CRISPR-related products are already  
84 available as plasmids and the latest CRISPR nuclease variants are rapidly being  
85 deposited to a growing, publically available resource (Addgene.org/crispr). In  
86 addition, in contrast to viral transduction and/or transgenic Cas9 expression, transient  
87 expression of nuclease and gRNA is sufficient and even preferred as a method to  
88 reduce off-target genome editing. Furthermore, technical advances make  
89 electroporation a clinically useful approach (9). Finally, RNPs are more difficult to  
90 produce than plasmids, particularly for complex constructs such as base editors, and

91 are more expensive than plasmids thus preventing access to low budget research  
 92 groups.

93 We report here a highly efficient method to ablate genes in primary murine T cells.  
 94 The approach is based on plasmids that are commonly accessible through publically  
 95 available resources (Addgene.org). Combining two plasmids enables efficient  
 96 multiplexed gene ablation. Gene edited T cells are viable, home to lymphoid organs,  
 97 expand in a lymphophenic environment and differentiate normally in response to a  
 98 viral infection in lymphoreplete mice. Using a novel assay, we additionally increased  
 99 the efficiency of HDR in primary CD4<sup>+</sup> T cells reaching up to 30% HDR using  
 100 commonly available reagents. Through the application of this approach we mapped a  
 101 native B cell epitope directly in primary cells and corrected a defective *Foxp3* gene.

102 We demonstrate that multiplexed HDR editing of a cell surface molecule can serve as  
 103 a surrogate marker to enrich for cells undergoing HDR at a second locus for which no  
 104 marker may exist, similar to previous findings (10). This principle was applied to  
 105 enrich gene-corrected Foxp3-deficient cells. Thus, we report a versatile T cell editing  
 106 approach, and provide proof-of-principle that gene-edited Foxp3-deficient T cells can  
 107 produce the repaired gene product, Foxp3 protein.

108

# 109 **Materials and Methods:**

110

## 111 *Gene editing in primary murine CD4<sup>+</sup> T cells*

112 Naïve CD4<sup>+</sup> T cells were purified (>96% purity) from C57BL/6N mouse spleen (SP)  
113 and lymph nodes (LN) using the EasySep™ Mouse Naïve CD4<sup>+</sup> T Cell Isolation Kit  
114 (STEMCELL Technologies Inc). Alternatively, total CD4<sup>+</sup> T cells were purified  
115 (>96% purity) from C57BL/6 SMARTA<sup>+</sup> CD45.1 mouse SP and LN using the  
116 EasySep™ Mouse CD4<sup>+</sup> T Cell Isolation Kit (STEMCELL Technologies Inc).  
117 Complete RPMI media (CM RPMI) was generated by supplementing RPMI (Sigma)  
118 with 10% heat-inactivated FCS (Atlanta biologicals), 2mM Glutamax (Gibco), 50μM  
119 β-mercaptoethanol (Gibco), 10mM HEPES (Sigma) and non essential amino acids  
120 (Gibco). For T cell activation, 2x10<sup>6</sup> naïve CD4<sup>+</sup> T cells were plated in a 24-well plate  
121 (Corning) coated with monoclonal antibodies (mAb) anti-CD3 (hybridoma clone  
122 2C11, 1μg/ml) and anti-CD28 (hybridoma clone PV-1, 0.5μg/ml, both BioXcell) for  
123 24h at 37°C with 5% CO<sub>2</sub> in the presence of 50IU/ml recombinant human Interleukin-  
124 2 (rhIL-2) (RD systems). 24h later T cells were harvested and washed with PBS.  
125 2x10<sup>6</sup> activated T cells were electroporated with the Invitrogen Neon® Transfection  
126 System (Invitrogen) at the following conditions: voltage (1550V), width (10ms),  
127 pulses (3), 100μl tip, buffer R. Cells were transfected with 6.5μg of empty plasmid  
128 px458 (Addgene plasmid number 48138) or the plasmids described in Figure legends  
129 and Table S1. (Addgene plasmid numbers 82670, 82672-82675, 82677, 102910). For  
130 HDR cells were co-transfected with 12μg HDR template (if plasmid: Table S3;  
131 Addgene 82661-82665, 82667, 104988) or 10μl of 10μM stock ssDNA template  
132 (Table S2) purchased from IDT. After electroporation cells were plated in 24-well  
133 plate in 650μl CM RPMI with 50IU rhIL-2/ml in the presence of plate-bound mAbs at

half the concentrations used for the initial activation, i.e. anti-CD3 (0.5µg/ml) and anti-CD28 (0.25µg/ml). GFP<sup>+</sup> and GFP<sup>-</sup> cells were sorted 24h post transfection using a FACS Aria Cell Sorter to >98% purity (BD Biosciences). Immediately after sorting cells were plated in 96 well flat bottom plates without activating antibodies in 250µl CM RPMI supplemented with 50IU rhIL-2/ml. For the HDR experiments sorted cells were cultured in the presence of NHEJ inhibitors or HDR enhancers for the following 24h in order to enhance HDR (as indicated in figure legends). Cells were re-activated with plate bound anti-CD3 (0.5µg/ml) and anti-CD28 (0.25µg/ml) on day 4 post GFP sorting and expanded for the following 9 days in culture until the end of the experiment. For in vivo editing experiment cells were injected immediately into the recipient mouse.

#### ***Gene editing in EL-4 cells***

EL-4 cells were grown in RPMI (Sigma) supplemented with 10% heat inactivated fetal bovine serum (Atlanta biologicals), 2mM Glutamax (Gibco) and 50µM β-mercaptoethanol (Gibco). FACS analysis confirmed homozygous CD90.2 and CD45.2 expression by EL-4 cells comparable to that of primary T cells. 2x10<sup>6</sup> EL-4 cells were electroporated with the Invitrogen Neon® Transfection System (Invitrogen) at the following conditions: voltage (1080V), width (50ms), number of pulses (1), 100µl tip. The amount of plasmids and concentrations of HDR templates were the same as for the primary T cells described above. After electroporation cells were plated in 24 well plates in 650µl CM RPMI. GFP<sup>+</sup> and GFP<sup>-</sup> cells were sorted 24h post transfection using a FACS Aria Cell Sorter (BD Biosciences) to a purity of >98%. Immediately after sorting cells were plated in 96 well flat bottom plates. For the HDR experiments, sorted cells were cultured in the presence of NHEJ inhibitors

159 or HDR enhancers for the following 24h in order to enhance the HDR. Cells were  
160 then expanded for the next 7-9 days in culture.

161

### 162 ***Foxp3 repair protocol***

163 Although the majority of T cells from Foxp3<sup>K276X</sup> C57BL/6 mice are highly activated,  
164 they had to be re-activated in vitro for electroporation, otherwise we could not obtain  
165 reasonable transfection efficiencies. We adjusted the protocol used to electroporate  
166 primary T cells from healthy mice by reducing the TCR stimulation in order to obtain  
167 a good balance between cell viability and transfection rate. In addition, we used total  
168 CD4<sup>+</sup> T cells as a starting population because of the low numbers of naïve T cells  
169 (data not shown). Total CD4<sup>+</sup> T cells were purified from Foxp3<sup>K276X</sup> C57BL/6 mice  
170 pooled SP and LN using the EasySep™ CD4<sup>+</sup> T Cell Isolation Kit (>96% purity)  
171 (STEMCELL Technologies Inc). For T cell activation, 2x10<sup>6</sup> CD4<sup>+</sup> T cells were  
172 plated in a 24-well plate coated with anti-CD3 (clone 2C11; 0.5µg/ml) and anti-CD28  
173 (clone PV-1; 0.25µg/ml) (BioXcell) for 24h at 37 °C with 5% CO<sub>2</sub>, with 50IU rhIL-  
174 2/ml (RD systems). 24h later T cells were harvested and washed with PBS. 2x10<sup>6</sup>  
175 activated T cells were electroporated with the Invitrogen Neon® Transfection System  
176 (Invitrogen) at the following conditions: voltage (1550V), width (10ms), number of  
177 pulses (3). Cells were transfected with 6.5µg of plasmid  
178 (p240\_LTJ\_sgRNAFoxp3K276X, Addgene number 82675) and 12µg of the dsDNA  
179 wt Foxp3 repair template (Addgene 82664). After electroporation cells were plated in  
180 24 well plate with 50IU/ml of rhIL-2 in the presence of plate bound mAbs at half the  
181 concentrations used for the initial activation, i.e. 0.25µg/ml anti-CD3 and 0.12µg/ml  
182 anti-CD28 in 650µl CM RPMI. GFP<sup>+</sup> and GFP<sup>-</sup> cells were sorted 24h post  
183 transfection using a FACSaria Cell Sorter to a purity >98% (BD Biosciences).



184 Immediately after cell sorting the purified cells were re-activated with plate bound  
185 anti-CD3 (0.5µg/ml) and anti-CD28 (0.25µg/ml) and expanded until the end of the  
186 experiment in the presence of rhIL-2 (250IU/ml), TGFβ (5ng/ml, RD Systems), anti-  
187 IFNγ (10mg/ml, BioXcell), anti-IL-4 (10mg/ml, BioXcell) and with or without  
188 Retinoic Acid (RA) (10mM, Sigma) as indicated in the figure legend.

189

## 190 ***Mice***

191 C57BL/6N (Charles River stock No: 027) were purchased at the Charles River  
192 laboratory. Foxp3<sup>K276X</sup> C57BL/6 (Jackson laboratory Stock No: 019933) mice were a  
193 generous gift from Ed Palmer (Basel University Hospital). C57BL/6 SMARTA  
194 CD45.1+ mice were obtained from the Swiss Immunological Mouse Repository  
195 (SwImMR). B6.129S7-Rag1<sup>tm1Mom</sup>/J (Jackson laboratory Stock No: 002216) mice  
196 were obtained from SwImMR. All animal work was done in accordance with the  
197 federal and cantonal laws of Switzerland. The Animal Research Commission of the  
198 Canton of Basel-Stadt, Switzerland, approved the animal research protocols.

199

## 200 ***Adoptive T cell transfers and LCMV immunization***

201 Edited SMARTA<sup>+</sup> CD45.1<sup>+</sup> CD4<sup>+</sup> T cells were transferred into C57BL/6 CD45.2<sup>+</sup>  
202 recipient mice by intravenous tail injections immediately after the GFP<sup>+</sup> cell sorting.  
203 Mice were infected intraperitoneally with LCMV Armstrong (2\*10<sup>5</sup> plaque forming  
204 units) 5 days after initial T cells transfer. Mice were euthanized 3, 5 or 7 days after  
205 virus administration.

206

## 207 ***Flow cytometry and antibodies***

Cells were stained and then acquired on a BD Fortessa (BD Biosciences) and analyzed with FlowJo software (Tree Star). Surface phenotype staining was done with the following fluorochrome-conjugated mAbs: anti-CD90.2 (clone 53-2.1), anti-CD90.1 (clone OX7), anti-CD45.2 (clone 104), anti-CD45.1 (clone A20), (all eBioscience), anti-CD4 (clone RM4-5), anti-CD25 (clone PC61, both Biolegend), anti-ICOS (clone 7E.17G9), anti-PD-1 (clone RMP1-14), anti-CXCR5 (clone L138D7) (all from Biolegend) The expression of Foxp3 (clone FJK-16s) (eBioscience) was determined by intracellular staining performed according to the manufacturers' protocols. Prior to staining of the surface antibodies cells were stained for live/dead discrimination with Zombie UV dye (Biolegend).

### ***Design of sgRNA***

DNA sequences of all sgRNAs, primers and HDR templates used in this paper are listed as 5'-3' sequences in the Supplementary information. sgRNAs were designed using the CRISPRtool (<http://crispr.mit.edu>) and sgRNA Scorer 1.0 (<https://crispr.med.harvard.edu>). The sgRNA sequences with their respective scores are listed in Table S1. For CD45 epitope mapping two sgRNAs were designed per candidate region. Results obtained with the ones closest to the SNP of interest are shown in the main figures. However, all 6 tested sgRNAs cut efficiently and region R1 switched epitopes with both sgRNAs (data not shown). The cut-to-mutation difference did not play a role.

228

### ***Cloning of sgRNAs into px458 plasmid***

pSpCas9(BB)-2A-GFP (PX458) was a gift from Feng Zhang (Addgene plasmid # 48138). Cloning into px458 was modified from Ref (11). The px458 plasmid was digested with BbsI for 1.5h at 37°C followed by heat inactivation for 20 min at 65°C.

233 The digested plasmid was gel-purified using the Nucleospin gel and PCR clean-up  
 234 purification kit according to the manufacturer's recommendations (Macherey-Nagel).  
 235 The forward and reverse oligonucleotides (oligo) of each sgRNA were diluted at  
 236 100μM in H<sub>2</sub>O. To phosphorylate and anneal the oligos, 2μl of each oligo were mixed  
 237 with T4 ligation buffer and T4 PNK to a final volume of 20μl and incubated for 30' at  
 238 37°C (phosphorylation) followed by 5' at 95°C and then ramping down the  
 239 temperature to 20°C at -1°C/min (annealing). The annealed and phosphorylated oligos  
 240 were diluted 1:200 in H<sub>2</sub>O. Ligation reactions for each sgRNA were performed by  
 241 mixing 100ng of the digested and purified px458 plasmid with 2μl of the diluted  
 242 phosphorylated and annealed oligos, T4 ligation buffer and T4 ligase in a final  
 243 volume of 20μl. Ligation was carried out for 1h at 22°C. Bacterial transformation was  
 244 performed by mixing 5μl of the ligation reaction with 50μl ice-cold chemically  
 245 competent JM109 bacteria. The mixture was incubated on ice for 30 min, followed by  
 246 a heat-shock at 42°C for 30'' and a subsequent 2' incubation on ice. Then, 200μl of  
 247 SOC medium (Sigma) was added and bacteria were grown for 1h at 37°C. All the  
 248 transformation reaction was plated on LB plates containing 50μg/ml ampicillin. The  
 249 plates were incubated overnight at 37°C. Colonies were checked for correct insertion  
 250 of the sgRNA by PCR colony screening followed by sequencing. Plasmids are  
 251 available from Addgene.org (Addgene plasmid numbers 82670, 82672 -82675,  
 252 82677, 102910).

253

#### 254 ***PCR colony screening for cloning into Addgene plasmid px458***

255 Bacteria from 2 colonies per plate were picked with a pipette tip and mixed in PCR  
 256 tubes with H<sub>2</sub>O, REDTaq<sup>®</sup> ReadyMix™ PCR Reaction Mix (Sigma) and specific  
 257 primers (forward primer GAGGGCCTATTTCCCATGATTCC, reverse primer

258 TCTTCTCGAAGACCCGGTG). PCR was performed using an annealing temperature  
259 of 64.9°C and 35 cycles. Positive colonies (with sgRNA insertion) will display no  
260 PCR amplicon whereas negative colonies will show a 264bp amplicon.

261

## 262 *Plasmid sequencing*

263 Two colonies were picked from each LB plate using a pipette tip and inoculated into a  
264 5 ml culture of LB medium supplemented with 50µg/ml ampicillin. The cultures were  
265 grown overnight at 37°C. Plasmid DNA from the culture was isolated by GenElute  
266 Plasmid Miniprep kit (Sigma) following the manufacturer's recommendations. Correct  
267 insertion of the sgRNA was verified by sequencing the plasmid DNA using a U6-  
268 forward primer (ACTATCATATGCTTACCGTAAC).

269

## 270 *HDR repair templates*

271 DNA repair templates were designed as homologous genomic DNA sequences  
272 flanking the sgRNA binding sites. Unless noted otherwise the sgRNAs were centered  
273 as much as possible with respect to the repair templates resulting in symmetric arms  
274 of homology. Silent mutations (i.e. not altering the amino acid sequence) were  
275 introduced into the PAM sequences. Short ssDNA templates were purchased from  
276 IDT. Lyophilized ssDNA oligos were reconstituted to 10µM in ddH<sub>2</sub>O (for specific  
277 sequences see Table S2). dsDNA templates for CD90.1, CD45.1 and Foxp3 (180bp,  
278 1kb, 2kb and/or 4kb) were purchased from Genscript as synthetic DNA cloned into  
279 pUC57 (for specific sequences see Table S3). Maxi preps (Sigma) were prepared for  
280 each of the plasmids prior to the use in the experiments. For all HDR experiments  
281 circular HDR template plasmids were used since we obtained better results compared  
282 to the use of linearized plasmids (data not shown). Plasmids containing HDR

283 templates are available from Addgene.org (Addgene plasmid numbers 82661-82665,  
284 82667, 104988).

285

# 286 *Small molecules*

287 The following NHEJ inhibitors were used to enhance HDR: vanillin (12) reconstituted  
288 in H<sub>2</sub>O, 300μM final concentration (Sigma cat#V1104); SCR7-X in DMSO, 1μM  
289 final (Xcess Biosciences cat#M60082). Since we purchased SCR7-X from Xcess  
290 Biosciences we refer to this compound as “SCR7-X” as recently suggested (13).  
291 Rucaparib/AG-014699/PF-01367338, in DMSO, 1μM final (Selleckchem  
292 cat#S1098); veliparib/ABT-888 in DMSO, 5μM final (Selleckchem cat#S1004); RS-1  
293 (14) in DMSO, 7.5μM final (MerckMillipore cat# 553510); RS-1 in DMSO, 7.5μM  
294 final, (Sigma cat#R9782); Luminespib/AUY-922/NVP-AUY922 in DMSO, 1μM  
295 final (Selleckchem cat#S1069); L-755,507 in DMSO, 5μM final (Tocris cat#2197);  
296 vanillin derivatives (12) 6-nitroveratraldehyde in DMSO, 3μM final (Maybridge  
297 cat#11427047), 4,5-dimethoxy-3-iodobenzaldehyde in DMSO, 3μM final (Maybridge  
298 cat#11328426); 6-bromoveratraldehyde in DMSO, 3μM final (Maybridge  
299 cat#11480124).

300

# 301 *Genomic DNA sequencing*

302 Genomic DNA from different sorted cell populations (e.g. CD45.2<sup>+</sup>/CD45.1<sup>-</sup>,  
303 CD45.2<sup>+</sup>/CD45.1<sup>+</sup>, CD45.2<sup>-</sup>/CD45.1<sup>+</sup>, and CD45.2<sup>-</sup>/CD45.1<sup>-</sup>) was extracted by  
304 incubating the cells with the extraction buffer (100mM Tris pH 8.5, 5mM Na-EDTA,  
305 0.2% SDS, 200mM NaCl and 100μg/ml Proteinase K; all from Sigma) for 1h at 56°C.  
306 After 15' heat inactivation of the proteinase K at 95°C, the samples were mixed with  
307 an equal volume of isopropanol and inverted several times to facilitate DNA

precipitation. After a 2' centrifugation, the supernatant was removed and the pellet washed with 70% ethanol. DNA was pelleted by centrifugation, air dried, resuspended in milliQ water and the concentration was measured with a NanoDrop device (Witec). PCR primers including BamHI (forward TAAGCAGGATCCATTCCTTAGGACCACCACCTG) and SalI (reverse TGCTTAGTCGACACACCGCGATATAAGATTTCTGC) overhangs were purchased (Microsynth) to amplify a region of 2kb for the HDR experiment where the sgRNA location was centered within the PCR product. PCRs with 2-6ng of the different genomic DNA samples were performed using Phusion polymerase (Thermo Scientific). For the 2kb fragment the optimal annealing temperature used was 68.1°C. The PCR products were loaded on a 1.5% agarose gel and the bands were purified using the Nucleospin gel and PCR clean-up purification kit according to the manufacturer's recommendations (Macherey-Nagel). The purified PCR products (160ng) were digested with BamHI and SalI using BamHI buffer for 1.5h at 37°C. The digested PCR products were loaded on a 1.5% agarose gel and the bands were purified using the Nucleospin gel and PCR clean-up purification kit according to the manufacturer's recommendations. 90ng of the digested and purified 2kb PCR amplicons were ligated for 1h at 22°C with 50 or 100ng pGEM3Z plasmid which had been BamHI/SalI digested and purified (Promega). Transformation was performed by mixing 10µl of the ligation reaction with 50µl ice-cold chemically competent JM109 bacteria (purchased from Promega or made using the RbCl protocol [http://openwetware.org/wiki/RbCl\\_competent\\_cell](http://openwetware.org/wiki/RbCl_competent_cell)). The mixture was incubated on ice for 30', followed by a heat-shock at 42°C for 30'' and a subsequent 2' incubation on ice. Then, 200µl of SOC medium (Sigma) was added and bacteria were grown for 1h at 37°C. All the transformation reaction was plated on LB plates containing

333 50µg/ml ampicillin, 0.1mM IPTG (Promega) and 35µg/ml x-Gal (Promega). The  
334 plates were incubated overnight at 37°C. From each plate 12 (22 for HDR) white  
335 colonies were picked using a pipette tip and inoculated into a 5 ml culture of LB  
336 medium supplemented with 50µg/ml ampicillin. The cultures were grown overnight  
337 at 37°C. Plasmid DNA from the culture was isolated by GenElute Plasmid Miniprep  
338 kit (Sigma) following the manufacturer's recommendations. DNA was sent for  
339 sequencing using the T7, SP6 and an internal primer  
340 (GAGAAAGCAACCTCCGGTGT) for the 2kb fragments. Sequences were analyzed  
341 using Lasergene (DNASTAR Inc.)

342

### 343 *Cas9 RNP assembly and transfection*

344 The delivery of a Cas9 RNP complex, containing an Alt-R CRISPR crRNA and Atto  
345 550 labeled tracrRNA (both from IDT) and a Cas9 nuclease (from QB3 MacroLab,  
346 UC Berkeley), into primary mouse T cells or EL-4 cells using the Neon®  
347 Transfection System (Invitrogen) were adapted from a protocol provided by IDT  
348 ([https://eu.idtdna.com/pages/docs/default-source/CRISPR/idt\\_protocol\\_nep-of-jurkat-](https://eu.idtdna.com/pages/docs/default-source/CRISPR/idt_protocol_nep-of-jurkat-rnp-rt_crs-10061-prv2-1.pdf?sfvrsn=20)  
349 [rnp-rt\\_crs-10061-prv2-1.pdf?sfvrsn=20](https://eu.idtdna.com/pages/docs/default-source/CRISPR/idt_protocol_nep-of-jurkat-rnp-rt_crs-10061-prv2-1.pdf?sfvrsn=20)). In brief, the RNA oligos (crRNA and  
350 tracrRNA) were resuspended in Nuclease-Free IDTE Buffer at final concentrations of  
351 200µM each. The two RNA oligos were mixed in equimolar concentrations to a final  
352 complex concentration of 44µM. The complexes were heated at 95° C for 5 min and  
353 then cooled down to room temperature. The 36µM Cas9 protein was pre-mixed  
354 slowly with the crRNA:tracrRNA complex and incubated at room temperature for 10–  
355 20 min before the transfection. Fresh crRNA:tracrRNA complexes were made for  
356 each experiment as per IDT recommendations.

357 EL-4 cells were transfected with RNPs using the Neon® Transfection System  
 358 (Invitrogen) at the following conditions: voltage (1380V), width (50ms), pulses (1)  
 359 100µl tip, buffer R (for RNPs). Primary T cells were transfected with RNPs using the  
 360 Neon® Transfection System (Invitrogen) at the following conditions: voltage  
 361 (1550V), width (10ms), pulses (3) 100µl tip, buffer R (for RNPs).  
 362  
 363



## 364 **Results:**

365

### 366 ***Efficient plasmid-based gene ablation in a murine T cell line***

367 We set out to develop a plasmid-based approach for CRISPR/Cas editing in primary T  
 368 cells. Based on a successful T cell electroporation protocol (15) we optimized  
 369 experimental conditions for murine EL-4 cells using a commonly available plasmid  
 370 expressing a sgRNA, SpCas9 and GFP (11), (Fig. 1A). One day after electroporation  
 371 we purified the successfully electroporated cells based on GFP expression. We  
 372 quantified the efficiency of gene editing in single cells for genes encoding cell surface  
 373 proteins using flow cytometry (Fig. 1B). After systematic optimization of  
 374 experimental conditions taking into account electroporation parameters, concentration  
 375 and choice of plasmid (size, promoter), cell number and timing, we achieved very  
 376 high deletion efficiencies for CD90.2 and CD45.2, which were lost in the vast  
 377 majority of cells compared to the control conditions (Fig. 1B and C). Next we asked  
 378 whether this protocol allows multiplexed gene editing by combining CD45.2 and  
 379 CD90.2 gene targeting. Almost half of the cells lost CD90.2 and CD45.2 expression  
 380 simultaneously, indicating homozygous deletion of both genes (Fig. 1D). Thus, we  
 381 successfully established very simple conditions for high efficiency gene editing in  
 382 EL-4 cells.

383

### 384 ***Efficient plasmid-based gene ablation in primary T cells***

385 Encouraged by these results we tested if the same plasmids could be used to edit  
 386 primary mouse CD4<sup>+</sup> T cells. To this end we added a T cell activation step with plate-  
 387 bound anti-CD3 and anti-CD28 monoclonal antibodies (mAb) required for  
 388 electroporation (Fig. 2A), (15). Careful titration of the concentration of mAbs used to

coat the plates and timing were necessary but ultimately we found conditions allowing good viability and transfection efficiencies up to 20% (Fig. 2A). Using sgRNAs targeting CD90.2 or CD45.2 we found 60-90% deletion efficiencies among purified GFP<sup>+</sup> cells (Fig. 2B and C). A second reactivation step with half the concentration of mAb was necessary for efficient editing. Remarkably, despite the notion that DNA-based CRISPR/Cas editing does not work in T cells, the gene ablation efficiencies are equal to alternative protocols using in vitro transcribed sgRNA/Cas9 mRNA or RNPs (2), (3) and even to the protocol using viral transduction of transgenic Cas9 expressing T cells (6). Next we combined the plasmids targeting CD90.2 and CD45.2. Similar to the efficiency in EL-4 cells, we found that more than half of the GFP expressing cells lost both surface proteins. As mentioned previously, a powerful aspect of studying murine T cells is the possibility of adoptively transferring (AT) T cells to immunologically matched recipients. Therefore, we wondered if the edited T cells functioned in vivo. To investigate this, we adoptively transferred T cells electroporated with sgRNA for CD90.2 into lymphodeficient RAG KO mice immediately after GFP sorting. Cells were harvested from lymph nodes (LN) and spleen (SP) 10 days after AT. We observed deletion of CD90.2 in up to 80% of CD4<sup>+</sup> T cells recovered from the LN and in up to 95% of CD4<sup>+</sup> T cells recovered from the SP (Fig. 2 E). Thus, overall, deletion efficiencies were comparable to the ones observed in vitro. The recovered cells were viable and had expanded substantially (data not shown). Furthermore, we wanted to examine whether CRISPR/Cas9 mediated editing could be used to study gene function in primary mouse CD4<sup>+</sup> T cells during a viral infection that induces T follicular helper (T<sub>FH</sub>) cell differentiation. We optimized experimental conditions based on a previously established protocol for acute infection with lymphocytic

414 choriomeningitis virus (LCMV) (16). We electroporated CD4<sup>+</sup> T cells bearing an  
 415 LCMV-specific transgenic T cell receptor (SMARTA) with plasmid encoding a  
 416 sgRNA for ICOS, a marker that is highly expressed by, and required for, T<sub>FH</sub>  
 417 differentiation (17). Sorted GFP<sup>+</sup> T cells were transferred immediately to C57BL/6N  
 418 mice. Transferred T cells were given 5 days to first migrate and then rest in host mice.  
 419 Thereafter, host mice were infected with LCMV to induce T<sub>FH</sub> cell differentiation.  
 420 Transferred cells were harvested from LN, mesenteric LN (mesLN) and SP at 3, 5 and  
 421 7 days post virus administration. Compared to control cells we observed a progressive  
 422 decrease in ICOS MFI of SMARTA<sup>+</sup> CD4<sup>+</sup> T cells recovered from all organs at all  
 423 examined time points, with a near complete absence of ICOS expression on day 7  
 424 (Fig. 2F and Suppl. Fig. 1A). Importantly, cells that had lost ICOS expression  
 425 (ICOS<sup>low</sup>) due to gene editing demonstrated impaired T<sub>FH</sub> differentiation based on  
 426 expression of the T<sub>FH</sub> markers CXCR5 and PD1 compared to the cells that maintained  
 427 high ICOS (ICOS<sup>high</sup>) expression (Fig. 2G and Suppl. Fig. 1B). Overall, this  
 428 demonstrates successful gene editing and confirms the importance of ICOS signals for  
 429 T<sub>FH</sub> differentiation (17).

430 Thus, this plasmid-based approach enables efficient gene ablation in primary  
 431 T cells and can be used to study T cell biology and gene function after adoptive  
 432 transfer in vivo, in lymphopenic hosts but also during viral infection of  
 433 lymphoreplete hosts.

434

### 435 ***Efficient introduction of targeted point mutations in EL-4 and primary T cells.***

436 Gene editing-induced DNA double strand breaks (DSBs) are mostly repaired  
 437 by non-homologous end joining (NHEJ) that results in random indels. In contrast,  
 438 double strand break (DSB) repair by HDR allows controlled genome editing and is

therefore desirable for more sophisticated experimental questions as well as for clinical applications. Unfortunately, as HDR occurs much more rarely, it remains challenging to establish efficient HDR protocols (18). The absence of suitable assays to readily quantify HDR events hinders improvement of HDR efficiencies in cells in general and particularly in primary cells. In order to allow rapid assessment of HDR efficiencies in T cells we designed a novel assay (Suppl. Fig. 2A-C). Two naturally occurring alleles of murine CD90 (CD90.1 and CD90.2) differ by a single nucleotide (nt) resulting in a single amino acid (aa) difference (CD90.1: arginine (Arg); CD90.2 glutamine (Gln)) (Suppl. Fig. 2B) that can be distinguished by two monoclonal antibodies (mAb), (19). We hypothesized that successful DNA editing from one allelic variant to the other could be quantified using the two allele specific mAbs (Suppl. Fig. 2B and C). To establish the allele-switching assay (ASA) we tested if we could switch the CD90.2 allele to CD90.1 in EL-4 cells by cutting with sgRNACD90.2 and providing a 180 bp ssDNA template encoding CD90.1 and a silent PAM mutation (Fig 3A left panel). Given the low HDR efficiency we observed in initial experiments (<1% CD90.1<sup>+</sup> cells) we sought for ways to increase it. As it was previously demonstrated that interfering with the DNA repair pathways could increase HDR efficiencies (20), we compared several small molecules known to interfere with the NHEJ pathway, or which directly enhance HDR, to find the best HDR enhancing strategy for T cells. Along with SCR7-X, the DNA-PK inhibitor vanillin, and the PARP1 inhibitor rucaparib yielded the strongest increase in HDR frequency (Fig. 3A, right panels). Other compounds, such as veliparib, L75507 (21), luminespib, RS-1 (14) and the vanillin derivatives A14415, A1359 and L17452 (12) increased HDR less or were toxic (data not shown). Since vanillin resulted in the strongest increase in HDR and, additionally, was the only water-soluble compound

we focused on vanillin for subsequent experiments. Thus, we demonstrate that allele switching of an endogenous gene can be used to quantify HDR as well as NHEJ in a population of cells with single cell resolution.

The next parameter we evaluated was the length of the repair template. While recent gene editing reports often used relatively short ssDNA templates (usually <200bp) the arms of homology for gene targeting in embryonic stem cells are usually much longer (several kb). Indeed, increasing the arms of homology of a circular dsDNA (plasmid) CD90.1 HDR template correlated positively with HDR efficiency (Fig. 3B). The largest increase was found between 1kb and 2kb total homology (Fig. 3B). Notably, the HDR enhancing effect of vanillin was more pronounced for shorter templates (180bp, 1kb) than for the long (2kb, 4kb) templates (Fig. 3C). Therefore we wondered if a long template without NHEJ inhibition could yield a comparable HDR frequency than shorter templates with NHEJ inhibitors. A direct comparison showed that 2kb and 4kb templates without vanillin resulted in much higher HDR frequencies than the 180bp and the 1kb template in the presence of vanillin (Fig. 3D). Thus, despite the notion in the field that ssDNA templates yield higher HDR efficiencies it is worth considering long arms of homology to increase HDR efficiency. Importantly, the optimized conditions also yielded high HDR frequencies in primary mouse CD4<sup>+</sup> T cells where around 20% of the total cells had switched one or both alleles (Fig. 3E, left panels). Interestingly, we noticed even higher HDR frequencies in large, blasting cells in which 25 % had undergone HDR (Fig. 3E, right panels). Thus, plasmids with long arms of homology are much more efficient to introduce point mutations to primary T cells than short ssDNA templates.

Given the many reports attributing low toxicity and high editing efficiencies to Cas9 RNPs in various cell types (NHEJ and HDR) we compared RNP performance to the

489 results obtained with plasmids. Electroporation of EL-4 cells with recombinant Cas9  
 490 complexed with tracrRNA/crRNA targeting the same CD90.2 sequence as the one  
 491 targeted by the plasmid-encoded sgRNA led to comparable KO frequencies (Suppl.  
 492 Fig. 2D, left panel and Fig. 1B). In contrast, in comparison to plasmid-mediated HDR  
 493 (Fig. 3B) we observed much lower HDR efficiencies when RNP was combined with  
 494 the plasmid HDR template (Suppl. Fig. 2D, right panel). Similar results were obtained  
 495 with primary T cells (compare Suppl. Fig. 2E and Fig. 2B, 3E). Since high HDR  
 496 efficiencies were reported for RNPs combined with short ssDNA templates we  
 497 compared HDR templates provided as long dsDNA, or as symmetric and asymmetric  
 498 short ssDNA templates, as described before (22). Compared to the all plasmid  
 499 approach, HDR efficiencies were much lower with RNPs, independent of template  
 500 design (Suppl. Fig. 2F).

501 Foreign DNA can integrate into the genome through homology-directed mechanisms  
 502 or through non-homologous or “illegitimate” insertion (23). Although rare, we tested  
 503 if our protocol resulted in detectable genomic plasmid integration. GFP expression  
 504 used to purify successfully transfected cells peaked 24h post transfection and rapidly  
 505 decreased in the following days becoming undetectable by flow cytometry after 5-7  
 506 days, both in EL-4 and primary T cells. We followed EL-4 cells up to 30 days in vitro  
 507 and primary T cells up to 16 weeks in vivo and were unable to detect any GFP in  
 508 these cells. However, using two different PCR primer sets detecting Cas9 or Cas9-  
 509 GFP we detected faint bands in EL-4 and primary T cells at all examined time points  
 510 (data not shown). We cannot tell whether this represents persisting extrachromosomal  
 511 episomal DNA or true genomic integration. Future studies are required to thoroughly  
 512 assess genomic plasmid integration.

Thus, the allele-switching assay described here is a simple, rapid and cost-effective system to quantify HDR efficiency with an endogenous marker in primary cells. Various HDR enhancing small molecules and HDR templates with long arms of homology (>1kb) are important parameters to consider when optimizing HDR efficiency.

### ***Epitope mapping of CD45.2 and CD45.1 binding antibodies in primary T cells.***

To test if the optimized conditions found with the CD90 ASA are more universally applicable we turned to *Ptpnc*, another gene with two naturally occurring alleles, whose products CD45.1 and CD45.2 can be discriminated by two mAbs. In contrast to CD90.1 and CD90.2 however, the precise epitope recognized by mAb anti-CD45.1 (clone A20) and mAb anti-CD45.2 (clone 104) is unknown. The genomic sequence encoding the extracellular domain of CD45.1 and CD45.2 differs by 6 nt but which epitope is being recognized as an allelic difference is unknown (Fig. 4A), (25), (26). One nt substitution is silent while the other five change the aa sequence. Therefore, we hypothesized that editing the five candidate nt substitutions individually, or as combinations directly in primary T cells, could be used to fine map the epitopes being recognized by the two known mAbs. We grouped the five candidate nt into three genomic regions (R1-R3) that could be covered by three ssDNA templates. Each HDR template encoded partial CD45.1 sequences and was matched to CD45.2 cutting sgRNAs binding as close as possible to the candidate mismatches (Fig. 4A). Using the T cell HDR protocol we found that all three sgRNAs led to efficient cuts (Fig. 4B). Exchange of a single nt within region R1 enabled binding of anti-CD45.1 mAb and prevented binding of anti-CD45.2 mAb in some cells. In contrast, editing R2 and R3 did not result in anti-CD45.1 binding (Fig. 4B).

538 A longer repair template increased HDR efficiency and confirmed this result (Fig.  
539 4C). Sanger sequencing of all 4 purified populations (Suppl. Fig. 3A) confirmed  
540 correct editing (Suppl. Fig. 3B). Thus, the Lys302Glu substitution is necessary and  
541 sufficient to explain reactivity of the CD45.1 epitope with mAb CD45.1 clone A20  
542 (Suppl. Fig. 3C). These results demonstrate the feasibility of epitope mapping in  
543 primary cells, i.e. in the native context of an endogenous antigen by means of using  
544 the CRISPR/Cas9 system. Furthermore, it validates the robustness of this HDR  
545 protocol and the ASA as a rapid and versatile assay to quantify single nucleotide  
546 editing.

547

#### 548 ***Gene correction of Foxp3-deficient primary T cells***

549 Next, we sought to apply the newly developed T cell editing protocol to  
550 correct a monogenic disease. The prototypic mutations causing human  
551 immunodysregulation polyendocrinopathy enteropathy X-linked (IPEX) syndrome  
552 are mutations in the *FOXP3* gene, which encodes a transcription factor critical for T  
553 regulatory cell (Treg) function, and maintenance of immune regulation (27), (28).  
554 Mutations in murine *Foxp3* lead to a very similar syndrome termed scurfy (27). A 2bp  
555 insertion in *Foxp3* exon 8 results in a frameshift leading to the scurfy phenotype (28).  
556 Affected mice die within weeks after birth due to multi-organ failure caused by a  
557 complete breakdown of immune tolerance resulting in uncontrolled activation of the  
558 immune system, tissue infiltration and immune-mediated destruction of multiple  
559 organs (29). Foxp3-deficient mice with a genetically marked *Foxp3* locus contain  
560 Treg “wanna-bes”, indicating that cells destined to become Foxp3<sup>+</sup> cells are actively  
561 transcribing the *Foxp3* locus and are present in scurfy mice, but due to the absence of  
562 Foxp3, they cannot be identified as Treg and they lack suppressive function (30),



(31). Thus, we hypothesized that gene correction of Foxp3 mutated T cells should lead to restoration of Foxp3 protein expression, a prerequisite for Treg function. To test our hypothesis we used T cells from gene targeted mice that bear a Foxp3<sup>K276X</sup> mutation that abolishes Foxp3 protein expression (“Foxp3 KO”) and recapitulates a known human IPEX disease-causing Foxp3 mutation (27), (31) (Fig. 5A). We adjusted the HDR-based gene repair approach to T cells from diseased mice and examined the in vitro Treg differentiation potential of gene-corrected Foxp3 KO cells by providing the Foxp3 inducing signals TGFβ alone, or as combined retinoic acid (RA) and TGFβ (32), (Fig. 5B). After gene repair and stimulation with TGFβ alone, 10% of wildtype (wt) T cells became CD25<sup>+</sup>Foxp3<sup>+</sup> while no Foxp3<sup>+</sup> cells were detected in Foxp3<sup>K276X</sup> CD4<sup>+</sup> T cells transfected with sgRNA<sub>Foxp3<sup>K276X</sup></sub> alone. In contrast, the Foxp3 wt repair template restored Foxp3 expression in 3.5% of the cells (Fig. 5C, top panel). Exposing electroporated T cells to combined TGFβ and RA resulted in 74% Foxp3 expression in wt T cells, no detectable Foxp3 expression in Foxp3<sup>K276X</sup> CD4<sup>+</sup> T cells without HDR repair template, and 18% Foxp3<sup>+</sup> T cells in Foxp3<sup>K276X</sup> CD4<sup>+</sup> T cells repaired with the wt Foxp3 HDR template (Fig. 5C, lower panel). Comparable results were obtained with scurfy cells (data not shown). Thus, the plasmid-based HDR protocol described here works to repair primary T cells from severely sick mice.

### ***Two HDR events are linked in a given cell***

Since we now had two unique assays at hand we wondered if the CD90 ASA and CD45 ASA could be combined to quantify multiplexed HDR in single cells. In order to address this question, we electroporated EL-4 cells with plasmids encoding sgRNAs targeting CD90.2 and CD45.2 along with repair templates for CD90.1 and

CD45.1. Cutting efficiency under these conditions was slightly lower than with fewer plasmids (data not shown) but HDR for CD90 and CD45 individual alleles was very efficient. We then sought to determine if two HDR events at two separate loci in the same cell are independent from each other or linked. We found a 2-fold enrichment of cells switching CD45.2 to CD45.1 in cells that had switched CD90.2 to CD90.1 compared to cells that remained CD90.1<sup>-</sup> (Fig. 6A). Importantly, a third of the CD90.2<sup>+</sup>/CD90.1<sup>+</sup> heterozygous cells were also heterozygous for CD45.2<sup>+</sup>/CD45.1<sup>+</sup> (Fig. 6B). Similarly, the highest relative frequency of homozygous CD45.1<sup>+</sup> cells was found among cells that were also homozygous for CD90.1<sup>+</sup> (Fig. 6B). Thus, DNA repair by the HDR pathway is more likely to occur in cells that concurrently repair a second DNA break by HDR.

599

#### 600 **Allele switching of a surrogate surface receptor enriches gene-repaired cells**

601 Finally, we wondered if linked HDR could be exploited to enrich correctly  
602 repaired cells using multiplexed HDR. In a clinical context it will be desirable to  
603 select correctly edited cells before transfusion to patients. However, identification of  
604 these cells (without killing them) is difficult if the repaired gene is not expressed at  
605 the cell surface. Since Foxp3 is an intracellular transcription factor we sought to  
606 repair primary Foxp3 KO CD4<sup>+</sup> T cells and combine the repair process with CD45.2  
607 to CD45.1 allele switching as a surrogate cell surface marker to monitor allele  
608 switching. As described in Fig. 5, total CD4<sup>+</sup> T cells were isolated from Foxp3<sup>K276X</sup>  
609 mice and electroporated with four plasmids to cut CD45.2 and mutant Foxp3 and  
610 repair them with CD45.1 and wt Foxp3 templates. Thereafter, cells were exposed to  
611 TGFβ to induce Foxp3 expression. Indeed, CD25<sup>+</sup>Foxp3<sup>+</sup> cells were substantially  
612 enriched among CD45.1<sup>+</sup> cells (16%) compared to CD45.1<sup>-</sup> cells (0.1%) (Fig. 7A).

613 Compared to *Foxp3* repair without allele switching, which under these conditions  
 614 (TGF $\beta$  alone) resulted in 3.5% *Foxp3* expressing cells (Fig. 5c, upper panel),  
 615 monitoring allele switching of a surrogate surface marker resulted in approximately 4-  
 616 fold enrichment. In summary, we established conditions to repair *Foxp3* in primary T  
 617 cells and demonstrate the applicability of multiplexing HDR to enrich gene-corrected  
 618 cells. We therefore propose that assessment of a surrogate marker HDR gene editing  
 619 event could be exploited to enrich and/or select for zygosity of HDR gene editing at a  
 620 second gene locus of interest for which no marker is available.

621

622

623 **Discussion:**

624

625       Efficient protocols to genetically engineer T cells will likely contribute to a  
626 better understanding of the architecture of our genome and the wiring of genetic  
627 networks guiding cellular behavior, and will, therefore, ultimately lead to safer and  
628 more efficient cellular therapies. In contrast to recent results suggesting that plasmid-  
629 based genome engineering is inefficient in T cells, our results demonstrate that  
630 plasmids are well-suited, very powerful and versatile vectors to edit a T cell's  
631 genome. Plasmids are commonly available, inexpensive, transiently expressed vectors  
632 which can be used to edit the many existing genetically modified mouse models  
633 including T cell receptor transgenic mice. Importantly, the method described here  
634 does not rely on importing and intercrossing mice but can immediately be applied to  
635 cells of existing mouse models, independent on genetic backgrounds. Thus, we expect  
636 that this method will accelerate research in areas as diverse as genome biology,  
637 development, lymphocyte biology, immunology and animal models of cellular  
638 therapy. It will be important to investigate potential genomic plasmid integration and  
639 off-target mutations. Since plasmids tend to persist longer in cells than RNPs and  
640 since by PCR we detect plasmid sequences in some cells up to several weeks after  
641 electroporation, the frequency of off-target cleavage could be increased compared to  
642 the use of RNPs. For many basic research questions this may not be relevant as off-  
643 target cleavage can be controlled for by using different sgRNAs. In contrast, for  
644 potential clinical translation these questions are highly relevant and warrant thorough  
645 investigation.

646 Our results go beyond the field of immunology however. Although targeted HDR is  
647 often preferred over NHEJ, achieving high efficiency HDR is still challenging. The

648 results from the allele switching assays suggest that HDR templates with long arms of  
649 homology should be revisited to increase HDR efficiency. In addition, while NHEJ  
650 inhibitors can be useful to increase HDR, in cases where NHEJ inhibitors are  
651 preferentially avoided (e.g. clinical gene editing), long arms of homology can prove  
652 effective and do not necessarily have to be virally delivered. Although we used  
653 dsDNA HDR templates it will be worthwhile to investigate if increasing the length of  
654 the arms of homology of ssDNA templates leads to comparably increased HDR  
655 efficiency. Using long ssDNA templates rather than dsDNA templates might also  
656 decrease the risk for off-target genomic HDR template integration. Moreover, we  
657 provide proof-of-concept data that genome-editing can be applied for rapid and  
658 precise epitope mapping in primary cells. This approach could be particularly  
659 powerful to characterize the majority of B cell epitopes, which are discontinuous, i.e.  
660 conformational. The approach presented here is unique since the mapping was  
661 achieved in primary cells, i.e. in the native context with all endogenous  
662 posttranslational modifications. Knowing precise epitopes is particularly important for  
663 the many therapeutic antibodies but also to define the binding sites of chimeric  
664 antigen receptors (CAR) that are derived from mAbs. Since tumors can escape attacks  
665 by the highly efficient CAR-T cells, gene editing-based epitope mapping could be  
666 applied to tumor cells to investigate escape mutants or to define tumor antigens.

667 Finally, cell-based therapeutics constitute the next “pillar” of medicine (33). Genome  
668 modification of the cellular product can repair genetic defects before subsequent  
669 autologous transplantation and allows equipping the cell with designer features to  
670 increase safety and efficacy (33), (34). Thus, protocols to efficiently introduce precise  
671 and targeted genetic modifications in hematopoietic cells, particularly T cells, are key  
672 to the success of adoptive T cell therapy. Targeted insertion of a CAR into the

673 endogenous T cell receptor locus is likely not only safer but also results in more  
674 efficient CAR-T cells compared to virally delivered randomly integrated CAR  
675 constructs (7), (35). To further optimize cellular products and to thoroughly  
676 investigate novel, experimental synthetic genetic networks, mouse models will remain  
677 important animal models for T cell therapy. To this end, this plasmid-based protocol  
678 enables efficient, non-viral, targeted cellular engineering to investigate new concepts  
679 for cellular therapies in immunocompetent mouse models (36). We would like to  
680 caution however, that adaptation of this protocol to human T cells, particularly for  
681 clinical use, would require a thorough investigation of potential genomic plasmid  
682 integration as well as possible other effects such as triggering of TLR9.

683

684 **Acknowledgments:**

685 We would like to thank the University of Basel, the Basel University Hospital and  
 686 Department of Biomedicine (DBM) for institutional support, the lab members, Pawel  
 687 Pelczar and the members of the DBM genome editing club for discussions, Marianne  
 688 Dölz, Oliver Gorka, Jeffrey Bluestone, Xuyu Zhou and Tony Nguyen for critical  
 689 comments on the manuscript and Regan Geissman for editorial assistance. Angelika  
 690 Offinger, Ulrich Schneider and team from the DBM animal facility for animal  
 691 husbandry. Ed Palmer and Carolyn King for kindly sharing mice, Georg Holländer for  
 692 kindly sharing EL-4 cells, Shane Crotty and Simon Bélanger for sharing ICOS  
 693 sgRNA sequences, Annalise Jauch for providing LCMV. Danny Labes, Emmanuel  
 694 Traunecker and Lorenzo Raeli of the DBM flow cytometry core for support and  
 695 Marco Amsler and Caroline Schwenzel for technical support.

696

# References

698

- 699 1. Mandal, Pankaj K., L. M. R. Ferreira, R. Collins, Torsten B. Meissner,  
700 Christian L. Boutwell, M. Friesen, V. Vrbanc, Brian S. Garrison, A.  
701 Stortchevoi, D. Bryder, K. Musunuru, H. Brand, Andrew M. Tager, Todd M.  
702 Allen, Michael E. Talkowski, Derrick J. Rossi, and Chad A. Cowan. Efficient  
703 Ablation of Genes in Human Hematopoietic Stem and Effector Cells using  
704 CRISPR/Cas9. *Cell Stem Cell* 15: 643-652.
- 705 2. Schumann, K. 2015. Generation of knock-in primary human T cells using  
706 Cas9 ribonucleoproteins. *PNAS* 112 10437-10442.
- 707 3. Hendel, A., R. O. Bak, J. T. Clark, A. B. Kennedy, D. E. Ryan, S. Roy, I.  
708 Steinfeld, B. D. Linstadt, R. J. Kaiser, A. B. Wilkens, R. Bacchetta, A.  
709 Tsalenko, D. Dellinger, L. Bruhn, and M. H. Porteus. 2015. Chemically  
710 modified guide RNAs enhance CRISPR-Cas genome editing in human  
711 primary cells. *Nat Biotech* 33: 985-989.
- 712 4. Ren, J., X. Liu, C. Fang, S. Jiang, C. H. June, and Y. Zhao. 2016. Multiplex  
713 Genome Editing to Generate Universal CAR T Cells Resistant to PD1  
714 Inhibition. *Clinical Cancer Research*.
- 715 5. Beil-Wagner, J., G. Dössinger, K. Schober, J. vom Berg, A. Tresch, M. Grandl,  
716 P. Palle, F. Mair, M. Gerhard, B. Becher, D. H. Busch, and T. Buch. 2016. T  
717 cell-specific inactivation of mouse CD2 by CRISPR/Cas9. 6: 21377.
- 718 6. Chu, V. T., R. Graf, T. Wirtz, T. Weber, J. Favret, X. Li, K. Petsch, N. T. Tran,  
719 M. H. Sieweke, C. Berek, R. Kühn, and K. Rajewsky. 2016. Efficient CRISPR-  
720 mediated mutagenesis in primary immune cells using CrispRGold and a  
721 C57BL/6 Cas9 transgenic mouse line. *Proceedings of the National  
722 Academy of Sciences*.
- 723 7. Cornu, T. I., C. Mussolino, and T. Cathomen. 2017. Refining strategies to  
724 translate genome editing to the clinic. *Nat Med* 23: 415-423.
- 725 8. Ren, J., X. Zhang, X. Liu, C. Fang, S. Jiang, C. H. June, and Y. Zhao. 2017. A  
726 versatile system for rapid multiplex genome-edited CAR T cell generation.  
727 *Oncotarget* 8: 17002-17011.
- 728 9. Fesnak, A. D., C. H. June, and B. L. Levine. 2016. Engineered T cells: the  
729 promise and challenges of cancer immunotherapy. *Nat Rev Cancer* 16:  
730 566-581.
- 731 10. Agudelo, D., A. Düringer, L. Bozoyan, C. C. Huard, and S. Carter. 2017.  
732 Marker-free coselection for CRISPR-driven genome editing in human  
733 cells. *Nat methods* 14: 615-620.
- 734 11. Ran, F. A., P. D. Hsu, J. Wright, V. Agarwala, D. A. Scott, and F. Zhang. 2013.  
735 Genome engineering using the CRISPR-Cas9 system. *Nature protocols* 8:  
736 2281-2308.
- 737 12. Durant, S., and P. Karran. 2003. Vanillins—a novel family of DNA-PK  
738 inhibitors. *Nucleic Acids Research* 31: 5501-5512.



- 739 13. Greco, G. E., Y. Matsumoto, R. C. Brooks, Z. Lu, M. R. Lieber, and A. E.  
740 Tomkinson. 2016. SCR7 is neither a selective nor a potent inhibitor of  
741 human DNA ligase IV. *DNA Repair* 43: 18-23.
- 742 14. Song, J., D. Yang, J. Xu, T. Zhu, Y. E. Chen, and J. Zhang. 2016. RS-1 enhances  
743 CRISPR/Cas9- and TALEN-mediated knock-in efficiency. *Nat Commun* 7.
- 744 15. Steiner, D. F., M. F. Thomas, J. K. Hu, Z. Yang, J. E. Babiarz, C. D. Allen, M.  
745 Matloubian, R. Blelloch, and K. M. Ansel. 2011. MicroRNA-29 regulates T-  
746 box transcription factors and interferon-gamma production in helper T  
747 cells. *Immunity* 35: 169-181.
- 748 16. Nance, J. P., S. Bélanger, R. J. Johnston, T. Takemori, and S. Crotty. 2015.  
749 Cutting Edge: T Follicular Helper Cell Differentiation Is Defective in the  
750 Absence of Bcl6 BTB Repressor Domain Function. *The Journal of*  
751 *Immunology* 194: 5599-5603.
- 752 17. Choi, Youn S., R. Kageyama, D. Eto, Tania C. Escobar, Robert J. Johnston, L.  
753 Monticelli, C. Lao, and S. Crotty. 2011. ICOS Receptor Instructs T Follicular  
754 Helper Cell versus Effector Cell Differentiation via Induction of the  
755 Transcriptional Repressor Bcl6. *Immunity* 34: 932-946.
- 756 18. Wang, H., M. La Russa, and L. S. Qi. 2016. CRISPR/Cas9 in Genome Editing  
757 and Beyond. *Annual review of biochemistry* 85: 227-264.
- 758 19. Williams, A., and J. Gagnon. 1982. Neuronal cell Thy-1 glycoprotein:  
759 homology with immunoglobulin. *Science (New York, N.Y.)* 216: 696-703.
- 760 20. Maruyama, T., S. K. Dougan, M. C. Truttmann, A. M. Bilate, J. R. Ingram, and  
761 H. L. Ploegh. 2015. Increasing the efficiency of precise genome editing  
762 with CRISPR-Cas9 by inhibition of nonhomologous end joining.
- 763 21. Yu, C., Y. Liu, T. Ma, K. Liu, S. Xu, Y. Zhang, H. Liu, M. La Russa, M. Xie, S.  
764 Ding, and Lei S. Qi. Small Molecules Enhance CRISPR Genome Editing in  
765 Pluripotent Stem Cells. *Cell Stem Cell* 16: 142-147.
- 766 22. Richardson, C. D., G. J. Ray, M. A. DeWitt, G. L. Curie, and J. E. Corn. 2016.  
767 Enhancing homology-directed genome editing by catalytically active and  
768 inactive CRISPR-Cas9 using asymmetric donor DNA. *Nat Biotech* 34: 339-  
769 344.
- 770 23. Wurtele, H., K. C. Little, and P. Chartrand. 2003. Illegitimate DNA  
771 integration in mammalian cells. *Gene therapy* 10: 1791-1799.
- 772 24. Paquet, D., D. Kwart, A. Chen, A. Sproul, S. Jacob, S. Teo, K. M. Olsen, A.  
773 Gregg, S. Noggle, and M. Tessier-Lavigne. 2016. Efficient introduction of  
774 specific homozygous and heterozygous mutations using CRISPR/Cas9.  
775 *Nature* 533: 125-129.
- 776 25. Raschke, W. C., M. Hendricks, and C. M. Chen. 1995. Genetic basis of  
777 antigenic differences between three alleles of Ly5 (CD45) in mice.  
778 *Immunogenetics* 41: 144-147.
- 779 26. Zebedee, S. L., D. S. Barritt, and W. C. Raschke. 1991. Comparison of mouse  
780 Ly5a and Ly5b leucocyte common antigen alleles. *Developmental*  
781 *immunology* 1: 243-254.
- 782 27. Ramsdell, F., and S. F. Ziegler. 2014. FOXP3 and scurfy: how it all began.  
783 *Nature reviews. Immunology* 14: 343-349.
- 784 28. Brunkow, M. E., E. W. Jeffery, K. A. Hjerrild, B. Paeper, L. B. Clark, S. A.  
785 Yasayko, J. E. Wilkinson, D. Galas, S. F. Ziegler, and F. Ramsdell. 2001.  
786 Disruption of a new forkhead/winged-helix protein, scurfy, results in the

fatal lymphoproliferative disorder of the scurfy mouse. *Nature genetics* 27: 68-73.

29. Khattri, R., T. Cox, S.-A. Yasayko, and F. Ramsdell. 2003. An essential role for Scurfin in CD4+CD25+ T regulatory cells. *Nat Immunol* 4: 337-342.

30. Gavin, M. A., J. P. Rasmussen, J. D. Fontenot, V. Vasta, V. C. Manganiello, J. A. Beavo, and A. Y. Rudensky. 2007. Foxp3-dependent programme of regulatory T-cell differentiation. *Nature* 445: 771-775.

31. Lin, W., N. Truong, W. J. Grossman, D. Haribhai, C. B. Williams, J. Wang, M. G. Martin, and T. A. Chatila. 2005. Allergic dysregulation and hyperimmunoglobulinemia E in Foxp3 mutant mice. *The Journal of allergy and clinical immunology* 116: 1106-1115.

32. Chen, W., W. Jin, N. Hardegen, K.-j. Lei, L. Li, N. Marinos, G. McGrady, and S. M. Wahl. 2003. Conversion of Peripheral CD4+CD25- Naive T Cells to CD4+CD25+ Regulatory T Cells by TGF- $\beta$  Induction of Transcription Factor Foxp3. *The Journal of Experimental Medicine* 198: 1875-1886.

33. Fischbach, M. A., J. A. Bluestone, and W. A. Lim. 2013. Cell-based therapeutics: the next pillar of medicine. *Sci Transl Med* 5: 179ps177.

34. Wu, C. Y., L. J. Rupp, K. T. Roybal, and W. A. Lim. 2015. Synthetic biology approaches to engineer T cells. *Current opinion in immunology* 35: 123-130.

35. Eyquem, J., J. Mansilla-Soto, T. Giavridis, S. J. C. van der Stegen, M. Hamieh, K. M. Cunanan, A. Odak, M. Gönen, and M. Sadelain. 2017. Targeting a CAR to the TRAC locus with CRISPR/Cas9 enhances tumour rejection. *Nature* 543: 113-117.

36. Davila, M. L., C. C. Kloss, G. Gunset, and M. Sadelain. 2013. CD19 CAR-Targeted T Cells Induce Long-Term Remission and B Cell Aplasia in an Immunocompetent Mouse Model of B Cell Acute Lymphoblastic Leukemia. *PLoS ONE* 8: e61338.

817 **Footnotes**

818 1 This work was supported by grants of the Swiss National Science Foundation  
 819 (SNSF Professorship PP00P3\_144860 to LTJ) and the National Institute Of Allergy  
 820 And Infectious Diseases of the National Institutes of Health, USA, under Award  
 821 Number R56/R01AI106923 (to LTJ) and a fellowship from the Fonds de Recherche  
 822 Santé Québec, Canada (to MK). The content of this study is solely the responsibility  
 823 of the authors and does not necessarily represent the official views of the National  
 824 Institutes of Health.

825

826 2 M.K. performed and analyzed all experiments in the manuscript. R.M. performed  
 827 cloning of PCR products for sequencing and analyzed sequencing data, helped  
 828 cloning and depositing plasmids, helped to write materials and methods and to  
 829 prepare the supplementary tables; M.K. and L.T.J. designed the experiments,  
 830 interpreted the data, discussed results and wrote the manuscript.

831

832 3 Data and materials availability: All plasmids used in the manuscript are deposited at  
 833 addgene.org

834

835 4 Address correspondence and reprint requests to Lukas T. Jeker, MD PhD, Assistant  
 836 Professor of Experimental Transplantation Immunology & Nephrology, Molecular  
 837 Immune Regulation, Lab 313, Department of Biomedicine, Basel University Hospital  
 838 and University of Basel, Hebelstrasse 20, CH-4031 Basel, Switzerland; e-mail:  
 839 [lukas.jeker@unibas.ch](mailto:lukas.jeker@unibas.ch)

840

841 5 The online version of this article contains supplemental material.

842

843 6 Competing interests: M.K. and L.T.J. have filed provisional patent applications  
 844 related to this work.

845

846 7 Abbreviations used in this article:

847 ASA, allele switching assay; ACT, adoptive cell transfer; CAR, chimeric antigen  
 848 receptor; Cas9, CRISPR associated protein 9; CRISPR, clustered regularly  
 849 interspaced short palindromic repeat; crRNA, CRISPR RNA; DSB, double strand  
 850 break; dsDNA, double stranded DNA, gRNA, guide RNA; HDR, homology directed  
 851 repair; hHSC, human hematopoietic stem cells; IPEX, immunodysregulation  
 852 polyendocrinopathy enteropathy X-linked; LCMV, lymphocytic choriomeningitis  
 853 virus; NHEJ, non homologous end joining; PAM, protospacer adjacent motif; RNP,  
 854 ribonucleoprotein; sgRNA, single guide RNA; SNP, single nucleotide polymorphism;  
 855 ssDNA, single stranded DNA; tracrRNA, trans-activating crRNA;

856

857

## 858 **Figure legends**

### 859 **FIGURE 1. Efficient plasmid-based gene ablation in EL4 cells.**

860 (A) Protocol for plasmid-based gene editing in EL-4 cells. Electroporation of a  
 861 plasmid encoding a sgRNA targeting the gene X, Cas9 and GFP (*step 1*). After 24h  
 862 successfully transfected cells are purified by flow cytometry based on GFP expression  
 863 (*step 2*). Subsequent cell expansion for 9 days for gene editing in vitro (*step 3*). (B)  
 864 Flow cytometry of EL-4 cells transfected as in A, with a plasmid encoding a CD90.2  
 865 targeting sgRNA (sgRNA90.2) or empty vector px458 (control). Flow cytometry  
 866 histograms (left panel) and quantification of multiple experiments (n=3); error bars  
 867 represent standard deviation (SD) (right panel). (C) Same conditions as in B but with  
 868 sgRNA45.2 or empty vector (control). Representative data from 3 experiments; error  
 869 bars represent SD. (D) EL-4 cells transfected as in A but with 2 plasmids encoding 2  
 870 sgRNAs (sgRNA90.2 and sgRNA45.2). Flow cytometry of cells transfected with  
 871 empty px458 vector (left panel) or cells transfected with plasmids encoding sgRNAs  
 872 targeting CD90.2 and CD45.2 (right panel). Representative data from 2 experiments.

873

### 874 **FIGURE 2. Efficient plasmid-based gene ablation in primary T cells.**

875 (A) Protocol for plasmid-based gene editing in primary CD4<sup>+</sup> T cells. Activation of T  
 876 cells prior to the transfection step with px458 plasmid (*step 1*). 24h later successfully  
 877 transfected cells are purified based on GFP expression (*step 2*) and expanded for 9  
 878 days in vitro as shown (*step 3*). (B) Primary T cells transfected as in A, with a plasmid  
 879 encoding a sgRNA90.2 or empty vector (control). Flow cytometry histograms (left  
 880 panel) and quantification of 3 experiments; error bars represent SD (right panel). (C)  
 881 Same conditions as in B but with sgRNA45.2 or empty vector (control).

882 Representative data from 3 experiments; error bars represent SD. (D) Primary T cells  
 883 were transfected as in A but with 2 plasmids encoding 2 sgRNAs (sgRNA90.2 and  
 884 sgRNA45.2) simultaneously. Flow cytometry of cells transfected with empty px458  
 885 vector (left panel) or cells transfected with plasmids encoding sgRNAs targeting  
 886 CD90.2 and CD45.2 (right panel). (E) Primary CD4<sup>+</sup> T cells transfected as in A, with  
 887 sgRNA90.2 or empty vector (control). Flow cytometry histograms for CD90.2  
 888 expression compared to the control on live CD4<sup>+</sup> T cells in LN and SP (left panel) and  
 889 quantification of multiple recipients (right panel). Representative data from 3  
 890 experiments; error bars represent SD. (F) Primary CD4<sup>+</sup> T cells transfected as in A,  
 891 except that CD4<sup>+</sup> total T cells were used as initial population, with sgRNAICOS or  
 892 empty vector (control). Flow cytometry histograms for ICOS on live CD45.1<sup>+</sup> donor  
 893 T cells compared to the controls in LN, mesLN and SP (left panel) at different time  
 894 points and quantification of multiple recipients for ICOS MFI (right panel). (G)  
 895 Demonstrates % CXCR5 and PD-1 double positive cells in LN, mesLN and SP within  
 896 ICOS low and ICOS high populations (day 5) compared to the non edited control.  
 897 Representative data from 2 experiments; error bars represent SD.

898

### 899 **FIGURE 3. Targeted introduction of point mutations in primary T cells.**

900 (A) EL-4 cells co-electroporated with a plasmid encoding a sgRNACD90.2 and a  
 901 180bp CD90.1 ssDNA template. Flow cytometry for CD90.2 and CD90.1 expression  
 902 in untreated (left panel) and treated samples (right panels). Representative data from 3  
 903 experiments. (B) EL-4 cells co-electroporated with plasmid sgRNACD90.2 and a  
 904 circular plasmid including a CD90.1 dsDNA template of various lengths (180bp, 1kb,  
 905 2kb, 4kb). Flow cytometry for CD90.2 and CD90.1. Representative flow cytometry  
 906 plots (left panel) and quantification of multiple experiments of the average frequency

of cells that underwent HDR (heterozygous and homozygous) (right panel). Representative data from 3 experiments; error bars represent SD. (C) Quantification of the effect of vanillin on the relative enrichment of HDR frequency (fold change) as a function of dsDNA template length. Experiment as in B. Fold increase of HDR frequency of cells treated with vanillin relative to absence of vanillin for each template. Representative data from 3 experiments; error bars represent SD. (D) Long templates without NHEJ inhibitor result in higher HDR frequency than short templates with NHEJ inhibitor. Quantification of HDR frequency obtained with short templates (180bp, 1kb) plus NHEJ inhibitor (vanillin) and long templates (2kb, 4kb) without vanillin. Experiment as in B. Representative data from 3 experiments; error bars represent SD. (E) Bead-enriched naïve CD4<sup>+</sup> T cells from C57Bl6/N mice activated and electroporated with empty px458 plasmid (control), with plasmid encoding for sgRNACD90.2 and a plasmid including a 1kb CD90.1 dsDNA template. Flow cytometry for CD90.2 and CD90.1 expression. Flow cytometry plots demonstrate gating on total live cells (left panels) and blasting cells (right panels). Representative data from 2 experiments.

923

**FIGURE 4. Epitope mapping of CD45.2 and CD45.1 binding antibodies in primary T cells.**

(A) Alignment of select regions of the genomic murine C57BL/6 CD45.1 and CD45.2 gene sequences. The extracellular domains of CD45.1 and CD45.2 differ by 6 nucleotides (indicated in red) in 3 different regions (designated R1, R2 and R3). sgRNA binding sites (green line), PAM sequence (black line). (B) High resolution gene editing-based mapping of the native CD45.1 epitope. Experimental setup as in Suppl. Fig. 2A. The three candidate regions were cut in primary CD4<sup>+</sup> T cells using



three different sgRNAs targeting the CD45.2 gene as close as possible to the SNP of interest (sgRNACD45.2\_R1, sgRNACD45.2\_R2 and sgRNACD45.2\_R3) and repaired with 3 different 180bp ssDNA CD45.1 templates (R1, R2, R3). Flow cytometry for CD45.2 and CD45.1 expression. The experiment was carried out once with EL-4 cells (not shown) and once with primary CD4<sup>+</sup> T cells. (C) Validation of results obtained in B using a longer 1kb CD45.1 dsDNA template. The Lys302Glu mutation is necessary and sufficient to switch CD45.2 reactivity to CD45.1 reactivity. Data are displayed as representative flow cytometry plot (left panel) and quantification of multiple experiments (right panel). Representative data from 3 experiments; error bars represent SD.

942

#### 943 **FIGURE 5. Gene correction of Foxp3 deficient cells.**

(A) Alignment of genomic DNA sequences of wt *Foxp3* (C57BL/6) and the *Foxp3* locus with a targeted mutation Foxp3<sup>K276X</sup> that introduces a premature stop codon. sgRNA binding site (green line) and PAM sequence (black line). (B) Protocol for gene editing of total CD4<sup>+</sup> T cells from Foxp3<sup>K276X</sup> C57BL/6 mice. In vitro activation and electroporation (*step 1*) with plasmids encoding sgRNA targeting the Foxp3<sup>K276X</sup> mutation and a circular plasmid containing a 1kb wt Foxp3 repair template. Successfully transfected cells are isolated based on GFP expression (*step 2*). Cell expansion in vitro for gene editing in presence of rhIL-2, TGFβ alone or in combination with RA and cytokine neutralizing antibodies (anti-IL-4 and anti-IFNγ) for 7 days (*step 3*). (C) Experimental setup as in B with total CD4<sup>+</sup> T cells from wt control or Foxp3<sup>K276X</sup> mice. Flow cytometry of CD25 and Foxp3 expression (gated on live CD4<sup>+</sup> T cells). Differentiation of wt cells electroporated with empty px458 plasmid into CD4<sup>+</sup>Foxp3<sup>+</sup>CD25<sup>+</sup> T cells (left panel), absence of Foxp3 differentiation

957 in Foxp3<sup>K276X</sup> cells electroporated with sgRNAFoxp3<sup>K276X</sup> alone (middle panel) and  
 958 restoration of Foxp3 protein expression in Foxp3<sup>K276X</sup> cells electroporated with  
 959 sgRNAFoxp3<sup>K276X</sup> and 1kb Foxp3 dsDNA repair template (right panel). Top row:  
 960 Foxp3 induction with TGFβ alone, bottom row: Foxp3 induction with TGFβ  
 961 combined with RA. Representative data from 2 experiments with Foxp3<sup>K276X</sup> cells.

962

963 **FIGURE 6. Enrichment of HDR-edited cells through monitoring of allele**  
 964 **switching of a surrogate cell surface marker.**

965 (A) Enrichment of HDR-edited cells using allele switching of a surrogate cell surface  
 966 marker. EL-4 cells electroporated with plasmids encoding sgRNACD90.2 and  
 967 sgRNACD45.2\_R1 and 2kb dsDNA templates (CD90.1 and CD45.1) for multiplexed  
 968 HDR. Flow cytometry for CD90.2, CD90.1, CD45.2 and CD45.1 expression. Top  
 969 panel: pre-gating on CD90.1<sup>-</sup> (green) and CD90.1<sup>+</sup> (red) i.e. allele switched cells  
 970 demonstrates that HDR events at a second locus (*Ptprc*) are linked within the same  
 971 cell. CD45 allele switched cells (lower panels) are more frequent in cells, which also  
 972 switched the CD90 allele. Representative data from two experiments. (B) Selection of  
 973 zygosity of HDR-edited cells. Experimental data as in A. Top panel: pre-gating on  
 974 heterozygous CD90.1<sup>+</sup>/CD90.2<sup>+</sup> cells (solid red line) enriches CD45.1<sup>+</sup>/CD45.2<sup>+</sup>  
 975 heterozygous cells (left bottom panel). Pre-gating on homozygous CD90.1<sup>+</sup>/CD90.1<sup>+</sup>  
 976 cells (top panel, dotted red line) enriches homozygous CD45.1<sup>+</sup>/CD45.1<sup>+</sup> cells  
 977 (bottom panel).

978

979 **FIGURE 7. Enrichment of Foxp3 repaired cells through monitoring of allele**  
 980 **switching of a surrogate cell surface marker.**

981 (A) Enrichment of gene-repaired Foxp3 expressing cells using multiplexed CD45  
 982 allele switching as a surrogate marker. Experimental setup as in Figure 5B but  
 983 simultaneous electroporation of plasmids encoding 2 sgRNAs (sgRNAFoxp3<sup>K276X</sup> and  
 984 sgRNACD45.2\_R1) and two 1kb dsDNA templates (Foxp3 wt and CD45.1). Flow  
 985 cytometry of CD45.2, CD45.1, CD25 and Foxp3 (gated on live CD4<sup>+</sup> cells). Top  
 986 panel: pre-gating on CD45.1<sup>-</sup> cells (green line) and CD45.1<sup>+</sup> cells (red line). Bottom  
 987 panel: Enrichment of CD25<sup>+</sup>Foxp3<sup>+</sup> cells in allele switched CD45.1<sup>+</sup> cells.  
 988 Representative data from 2 experiments.

989

990

991 **Supplemental Figure legends**

992 **SUPPLEMENTAL FIGURE 1. *Plasmid-based ICOS ablation prevents LCMV***  
 993 ***induced  $T_{FH}$  differentiation.***

994 (A) Primary CD4<sup>+</sup> T cells transfected as in Fig 2A, except that CD4<sup>+</sup> total T cells  
 995 were used as initial population, with sgRNA<sub>ICOS</sub> or empty vector (control). Flow  
 996 cytometry histograms for ICOS on live CD45.1<sup>+</sup> donor T cells relative to the non-  
 997 edited cells in LN, mesLN and SP (left panel) and quantification of multiple  
 998 recipients for ICOS MFI (right panel). (B) Demonstrates CXCR5 and PD-1 double  
 999 positive cells in LN, mesLN and SP within cells that were transfected with  
 1000 sgRNA<sub>ICOS</sub> compared to the non-edited control. Representative data from 2  
 1001 experiments; error bars represent SD.

1002

1003 **SUPPLEMENTAL FIGURE 2. Allele switching assay to monitor and optimize**  
 1004 **HDR based editing efficiencies.**

1005 (A) Protocol for plasmid-based HDR in CD4 T cells. Activation and electroporation  
 1006 of primary T cells (*step 1*). Purification of GFP<sup>+</sup> cells by flow cytometry (*step 2*). Cell  
 1007 incubation for 24h with NHEJ inhibitor. Subsequent in vitro cell expansion for gene  
 1008 editing for 6-9 days with reactivation 4 days post sorting (*step 3*). EL-4 cells are  
 1009 transfected the same way, except they do not require TCR activation prior to the  
 1010 electroporation or on day 4 post sorting and electroporation parameters are different  
 1011 (see Materials & Methods). (B) Genomic CD90.1 and CD90.2 nt and aa sequences.  
 1012 The CGA (CD90.1)/CAA (CD90.2) SNP leading to Arg108Gln is highlighted in red.  
 1013 (C) Graphic representation of the experimental readout: Q1: unedited cells or cells  
 1014 with mutations which do not abolish protein expression, e.g. in-frame mutations Q2:

1015 cells after NHEJ Q3: edited CD90.2/CD90.1 heterozygous cells Q4: edited  
 1016 homozygous CD90.1 cells or cells with one KO allele and one HDR edited allele. (D)  
 1017 EL4 cells transfected with Cas9 RNP targeting CD90.2 alone or with 2 kb dsDNA  
 1018 CD90.1 DNA template. Flow cytometry for CD90.2 and CD90.1. (left panel) and  
 1019 quantification of 2 experiments; error bars represent SD (right panel). (E) Primary  
 1020 CD4<sup>+</sup> T cells transfected with Cas9 RNP targeting CD90.2 alone or with 2kb dsDNA  
 1021 CD90.1 DNA template. Flow cytometry for CD90.2 and CD90.1. (left panel) and  
 1022 quantification of 2 experiments; error bars represent SD (right panel). (F) EL4 cells  
 1023 transfected with Cas9 RNP or px458 plasmid targeting CD90.2 alone or with CD90.1  
 1024 DNA templates provided as symmetric and asymmetric 180bp ssDNA templates or as  
 1025 a plasmid including a 2 kb dsDNA template. Quantification of KO efficiency and  
 1026 HDR in presence of symmetric, asymmetric short ssDNA, or long dsDNA template  
 1027 between plasmid based and RNPs approach.

1028

### 1029 **SUPPLEMENTAL FIGURE 3. Sanger sequencing of HDR edited populations.**

1030 (A) Pre- and post-sort frequencies and purity of the cell populations isolated for DNA  
 1031 sequencing. (B) EL-4 cells electroporated with a plasmid encoding a sgRNACD45.2  
 1032 and a circular dsDNA plasmid carrying 2kb CD45.1 as described in Suppl. Fig.2A.  
 1033 Cells were cultured for 9 days in vitro, then harvested and sorted by flow cytometry  
 1034 based on CD45.2 and CD45.1 expression in order to isolate four defined populations:  
 1035 CD45.2<sup>+</sup>/CD45.1<sup>-</sup> (Q1), CD45.2<sup>-</sup>/CD45.1<sup>-</sup> (Q2), CD45.2<sup>+</sup>/CD45.1<sup>+</sup> (Q3) and CD45.2<sup>-</sup>  
 1036 /CD45.1<sup>+</sup> (Q4). DNA was extracted and cloned for Sanger sequencing as described in  
 1037 materials and methods. No indels were found at both ends of the templates for  
 1038 populations Q3 and Q4 (data not shown). (C) Genomic CD45.1 and CD45.2 nt and aa

1039 sequences. The GAA (CD45.1) AAA (CD45.2) SNP leading to Lys302Glu are  
1040 highlighted in red.

1041 **Supplementary tables:**

1042

1043 Table S1. sgRNA design and their specific sequences.

1044 Table S2. Single strand (ss) DNA templates for HDR repair experiments.

1045 Table S3. Double strand (ds) DNA templates for HDR repair experiments.

1046

1047

1048

1049

1050

1051

1052

1053

1054

1055

1056

# Figure 1

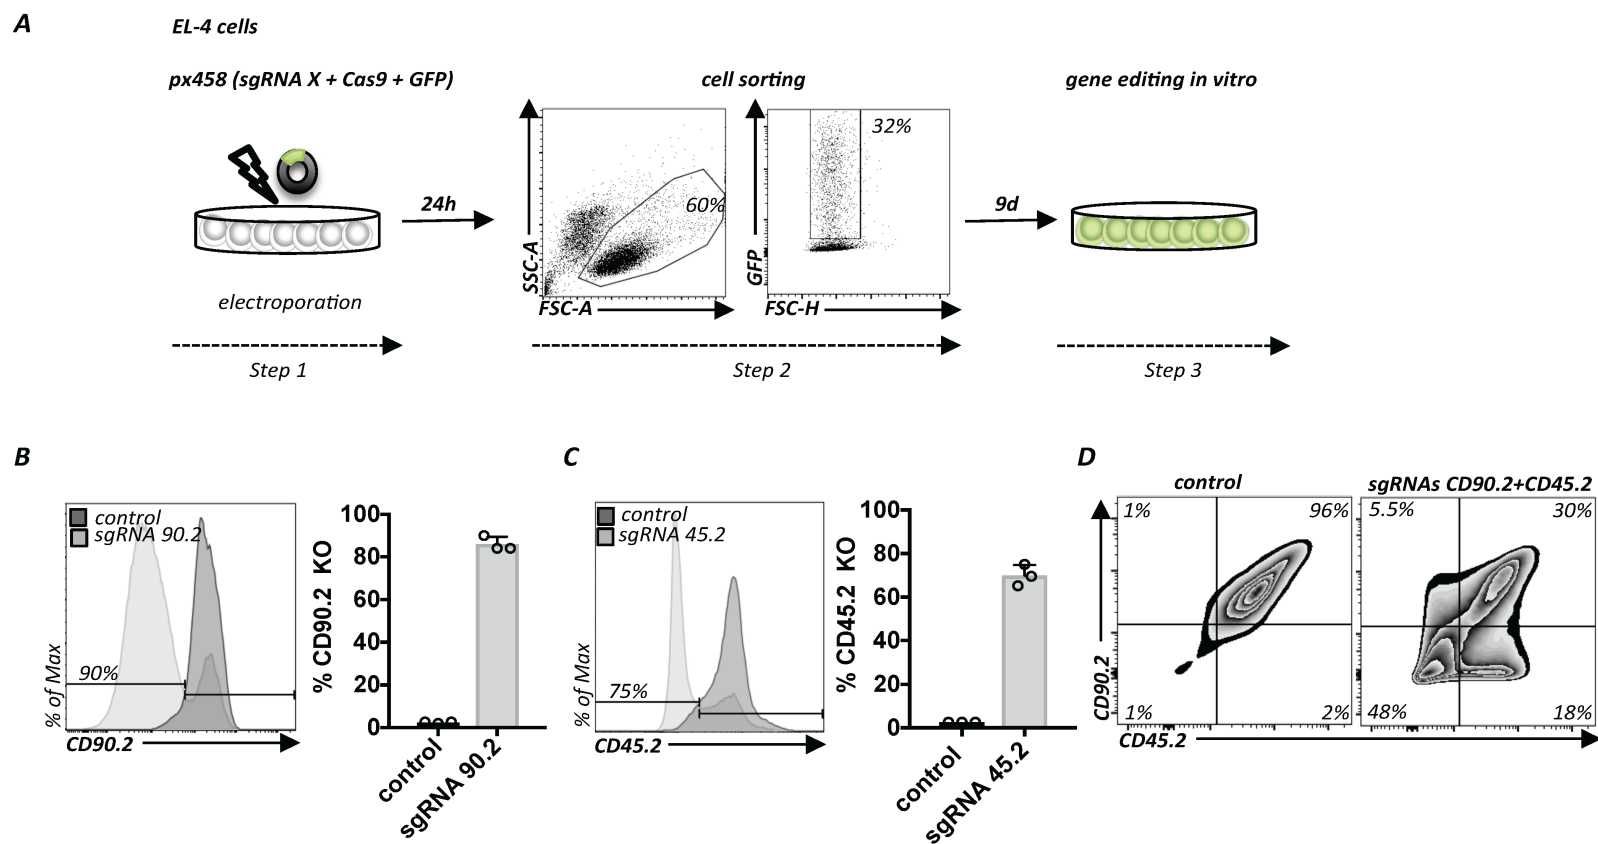



# Figure 2

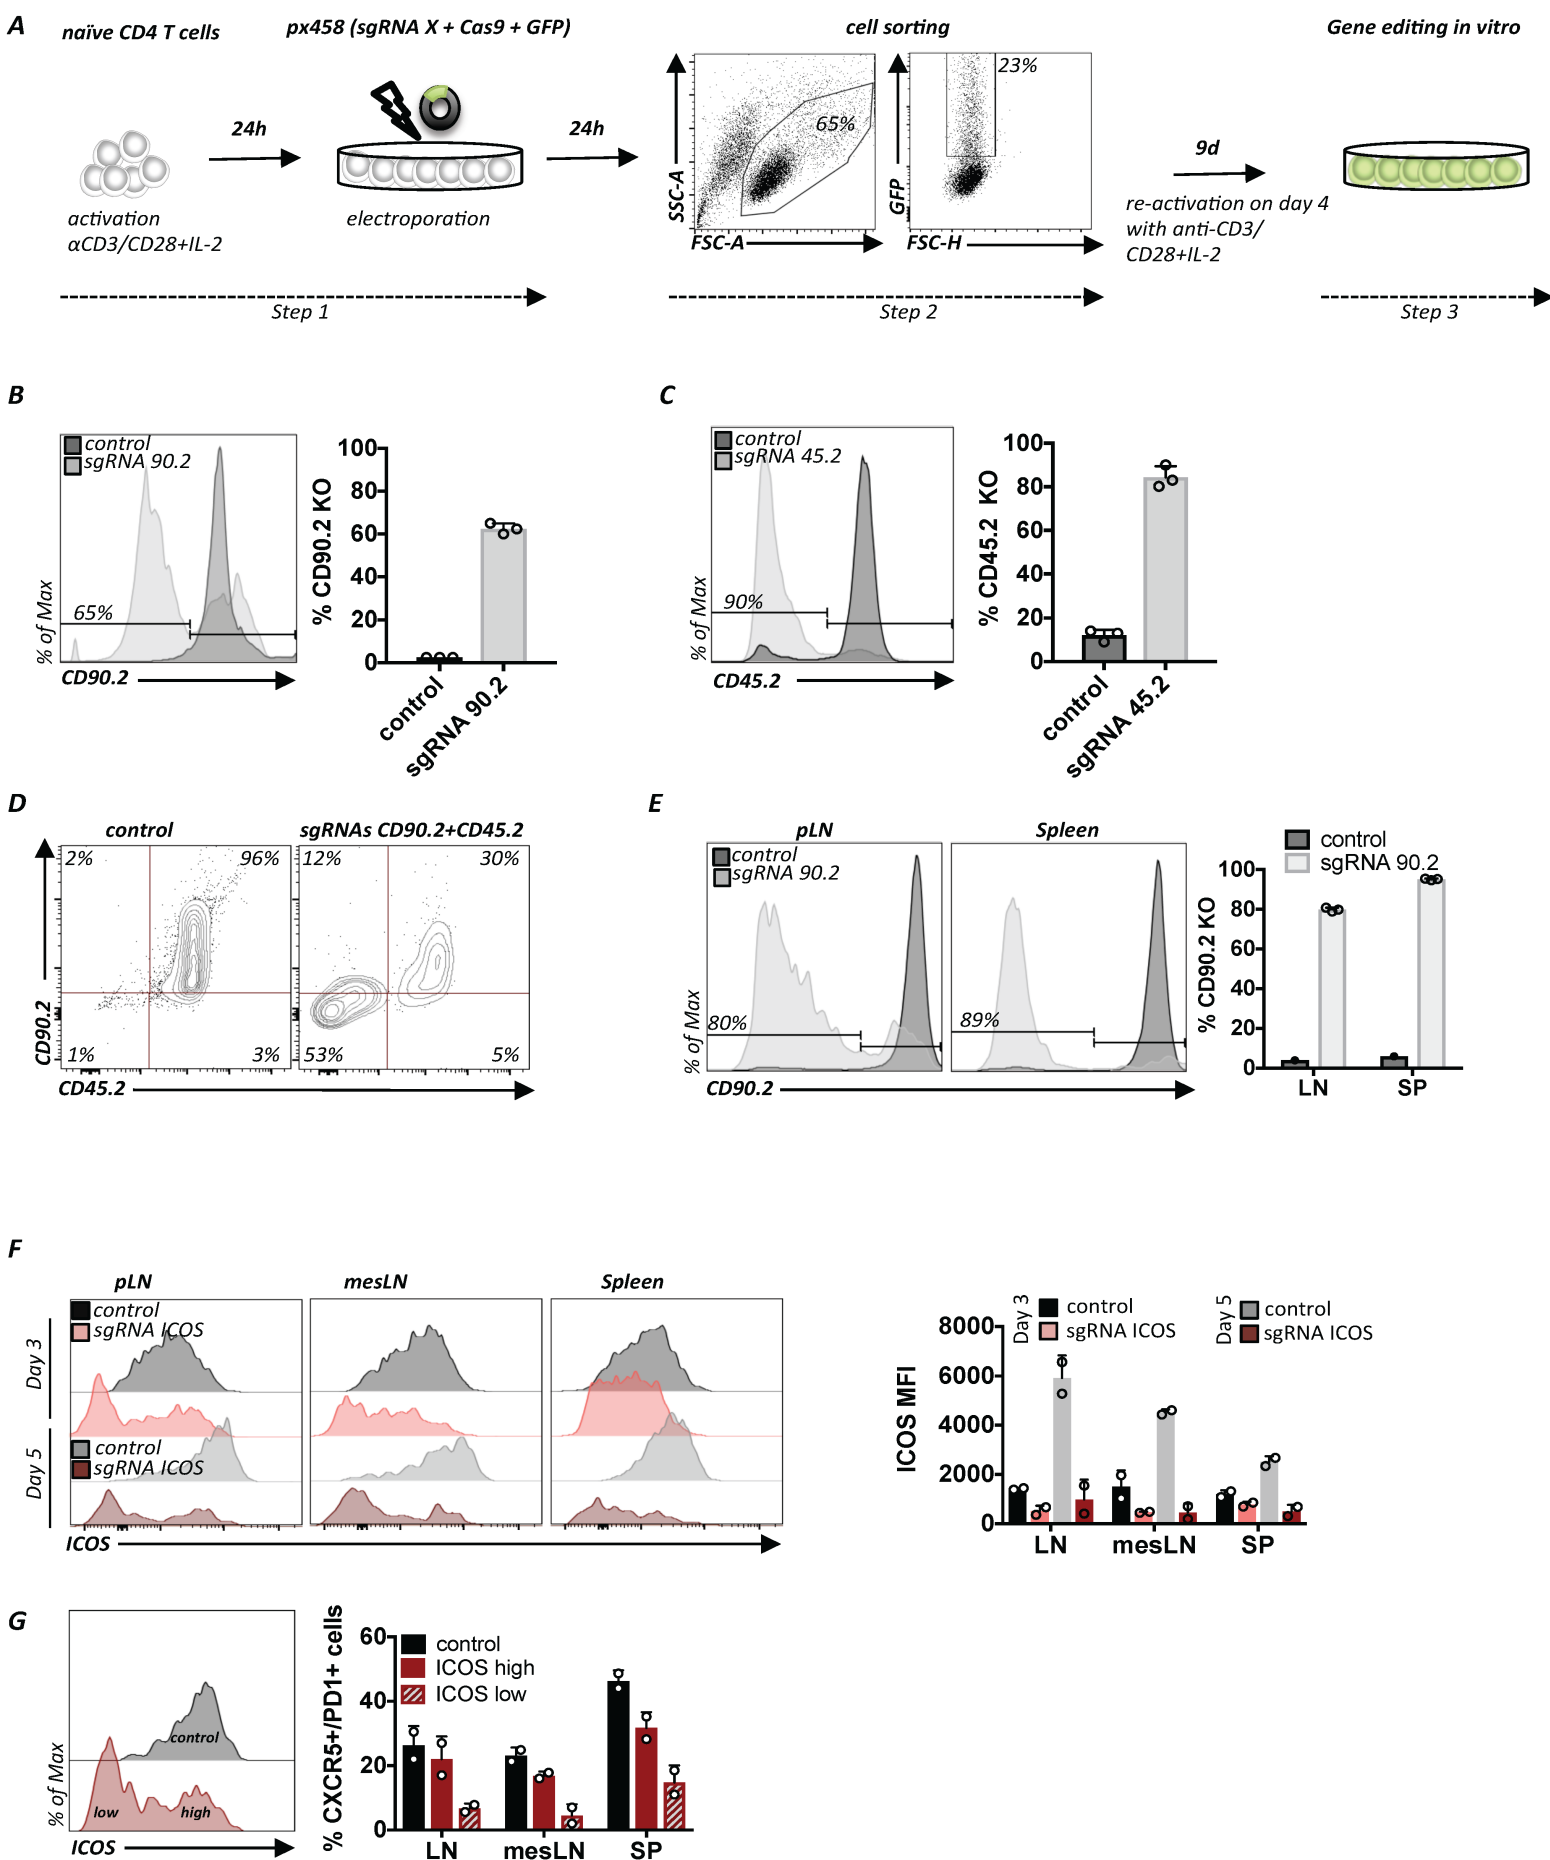

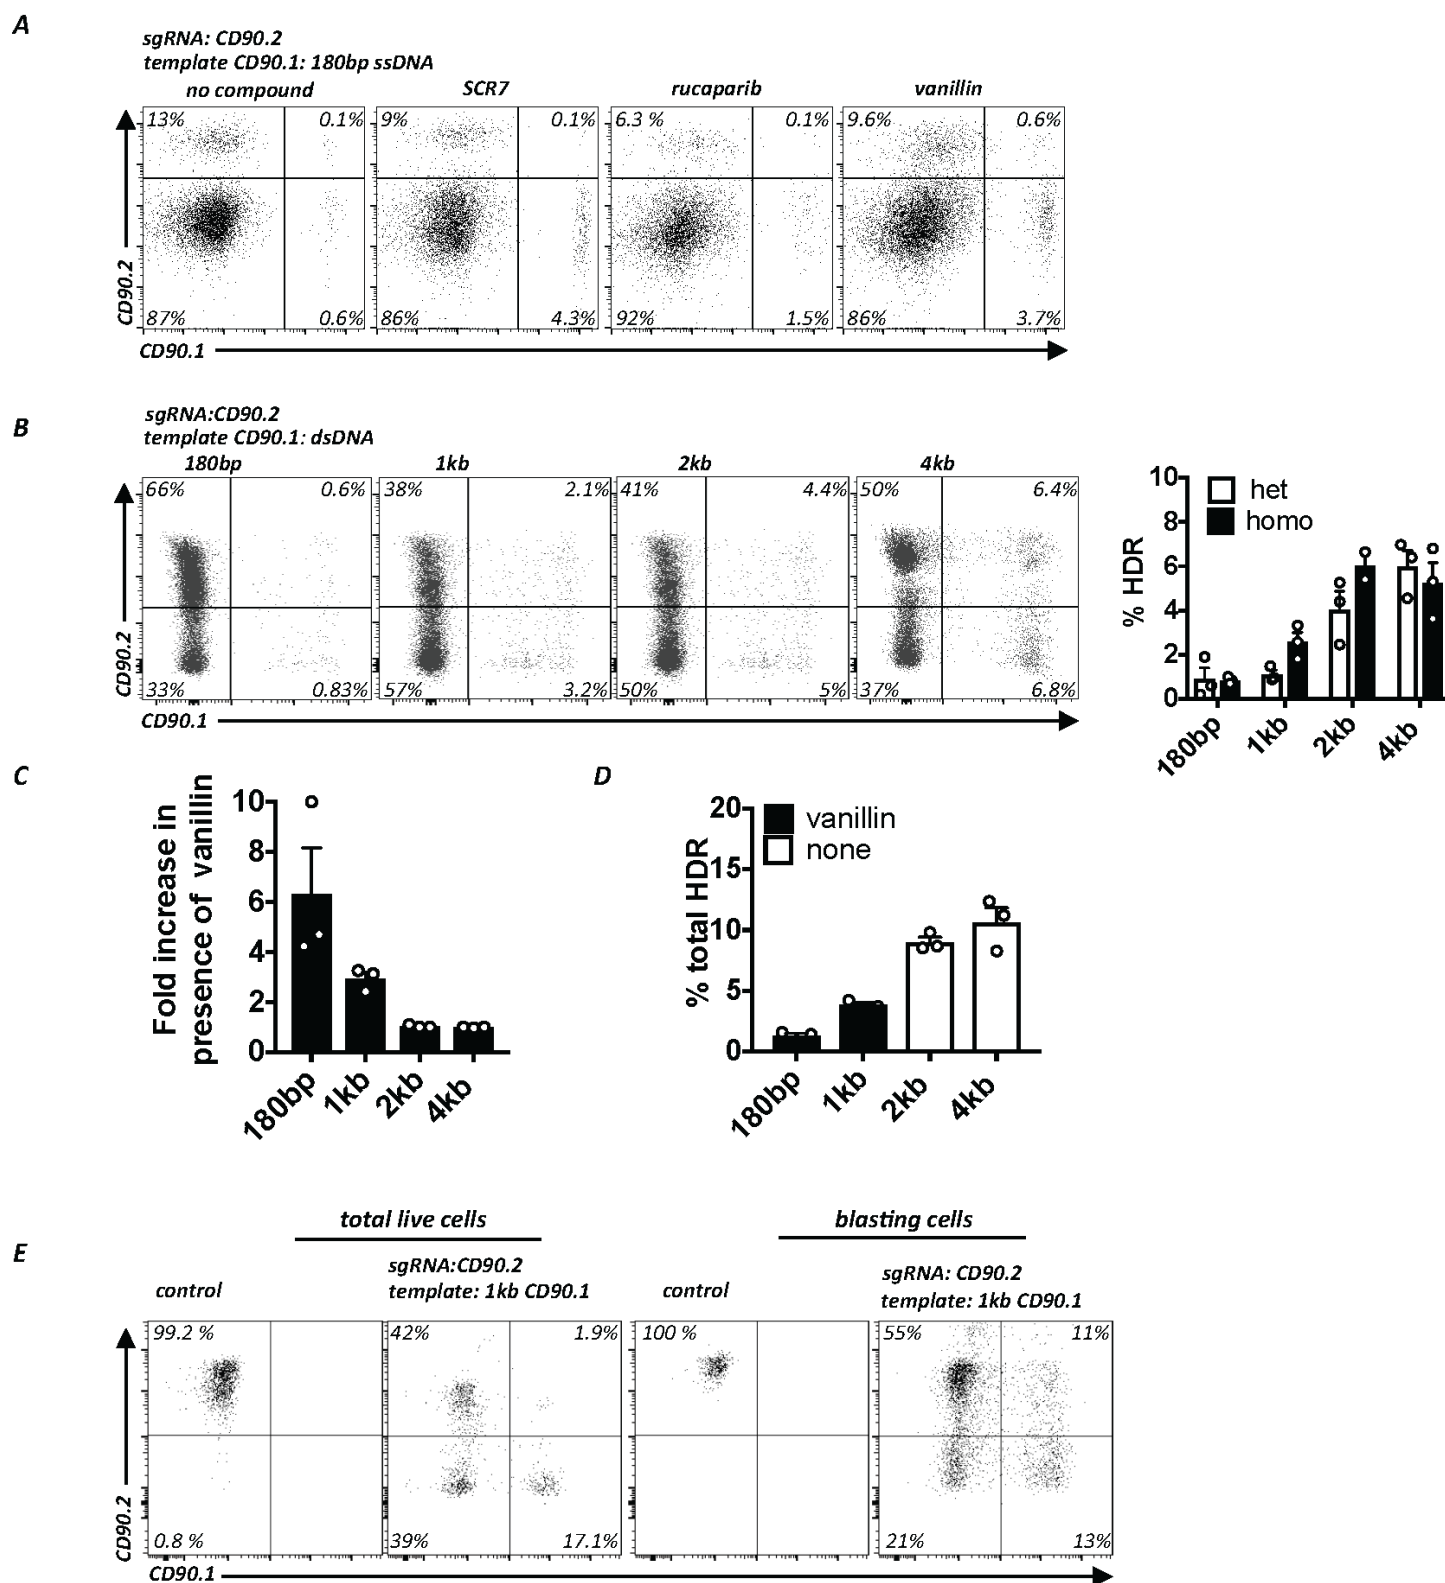

A

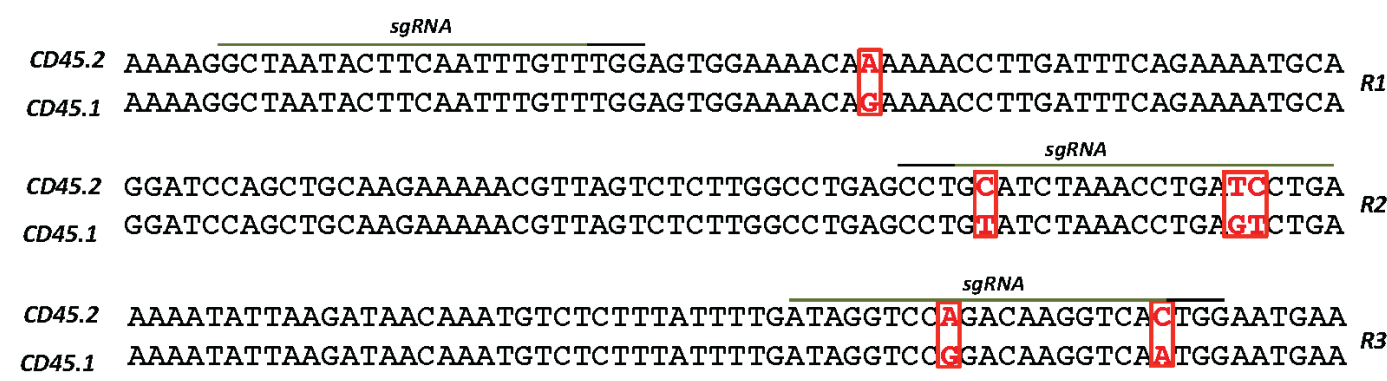

B

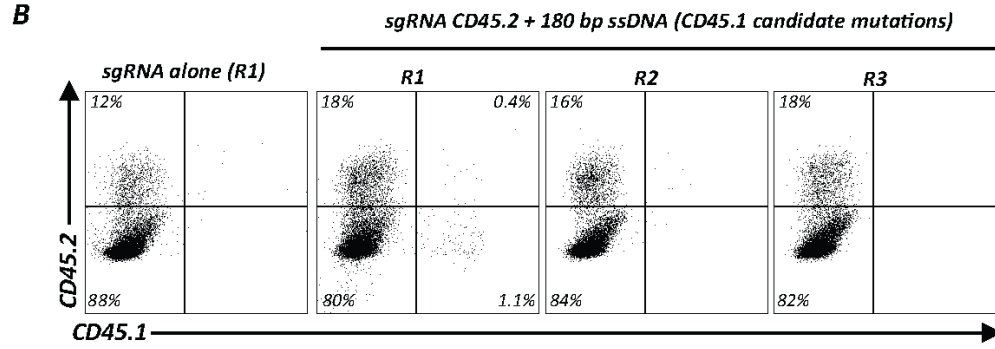

C

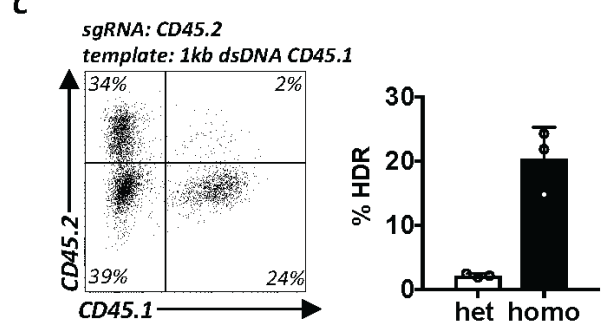

WT *Foxp3* GCCTCAATGGAC AAGA GC TCTTGCTGCATCGTAGCCACCAGTACTCAGGGCAGTGTGCTCCCG  
 sgRNA  
*Foxp3*<sup>K276X</sup> GCCTCAATGGAC TAGA TA TCTTGCTGCATCGTAGCCACCAGTACTCAGGGCAGTGTGCTCCCG

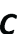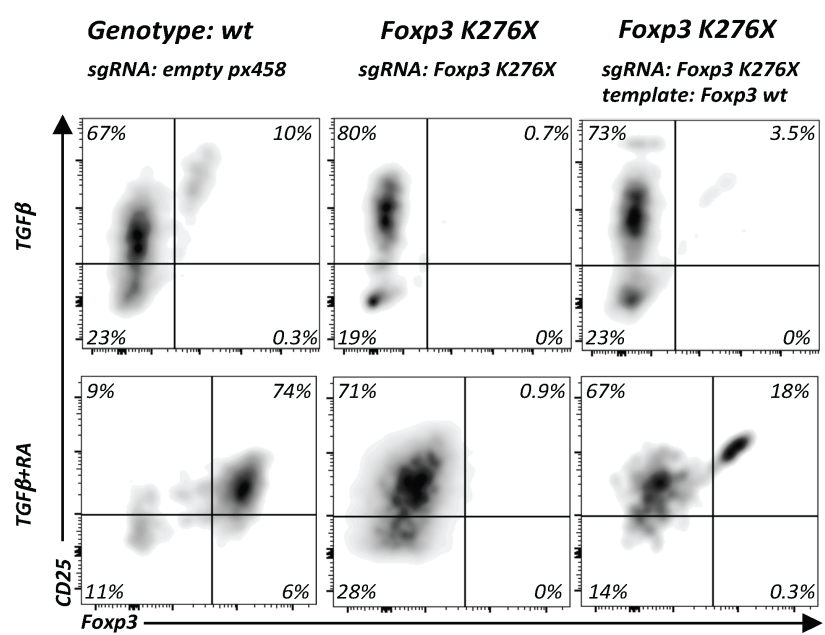

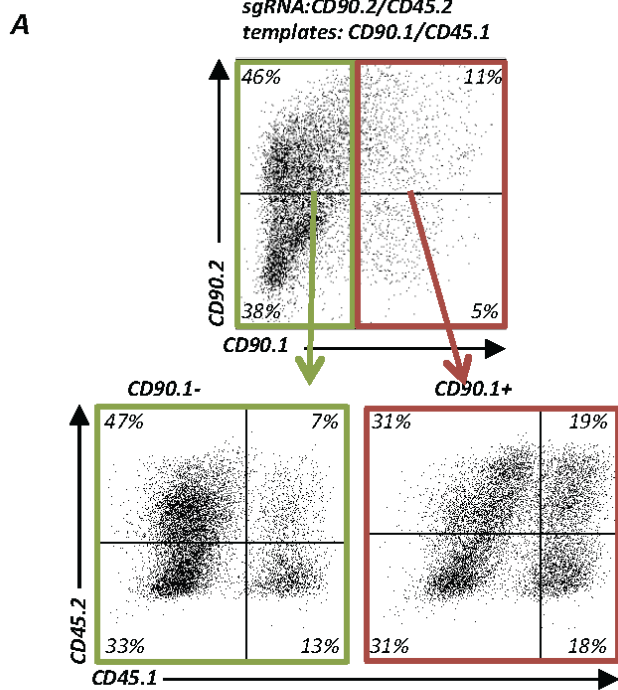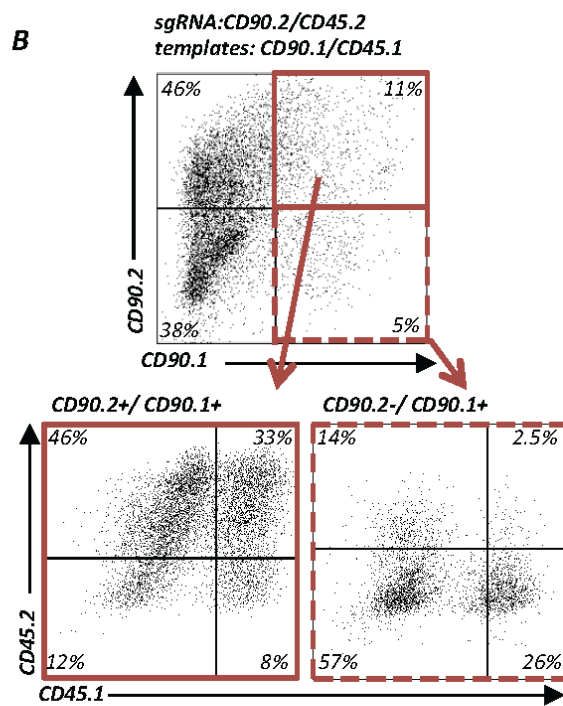

A

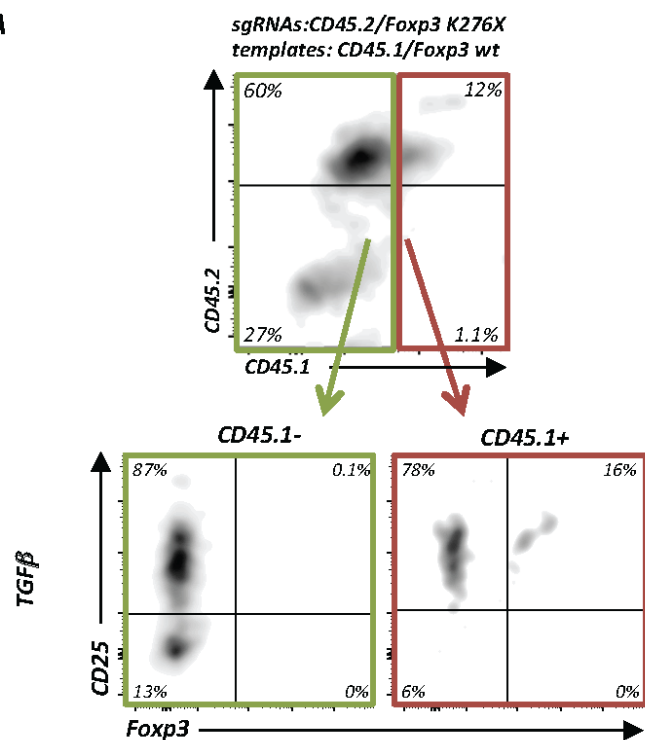

Source: http://biorxiv.org/content/10.1101/247544v1.full.pdf
